# Supplementary material
Source: MDPI journal article supplement (https://www.mdpi.com/2624-8549/5/2/58)

**Supporting information for**

**Coinage metal complexes containing perfluorinated carboxylates.**

Robin Piani<sup>a</sup>, Björn B. Beele<sup>a</sup>, J. Rust<sup>b</sup>, Christian W. Lehmann<sup>b</sup> and Fabian Mohr<sup>a,\*</sup>

<sup>a</sup> *Anorganische Chemie, Fakultät für Mathematik und Naturwissenschaften, Bergische Universität Wuppertal, Gaußstr. 20, 42119 Wuppertal, Germany*

<sup>b</sup> *Chemische Kristallographie und Elektronenmikroskopie, Max-Planck-Institut für Kohlenforschung, Kaiser-Wilhelm-Platz 1, 45470 Mülheim an der Ruhr, Germany.*

Corresponding author e-mail: fmohr@uni-wuppertal.de

**Contents**

NMR spectra of the complexes

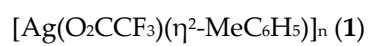

$^1\text{H}$  NMR ( $\text{CD}_3\text{OD}$ )

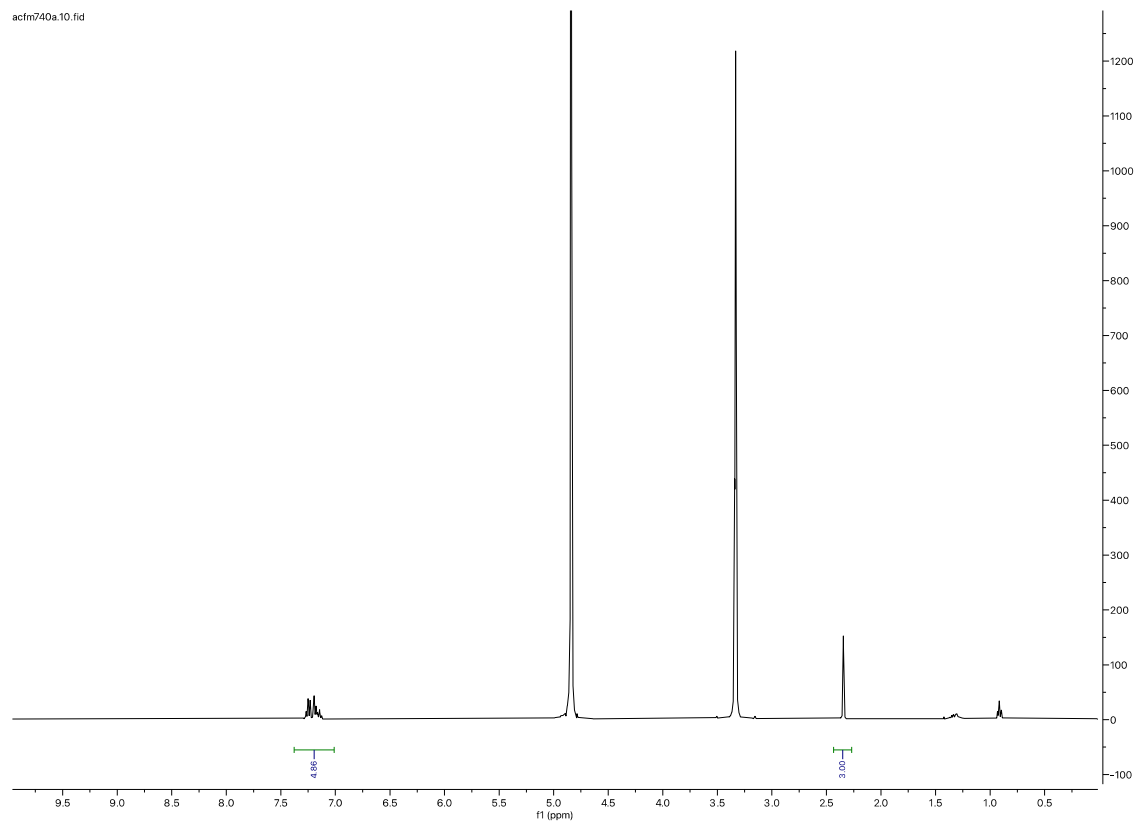

$^{19}\text{F}$  NMR ( $\text{CD}_3\text{OD}$ )

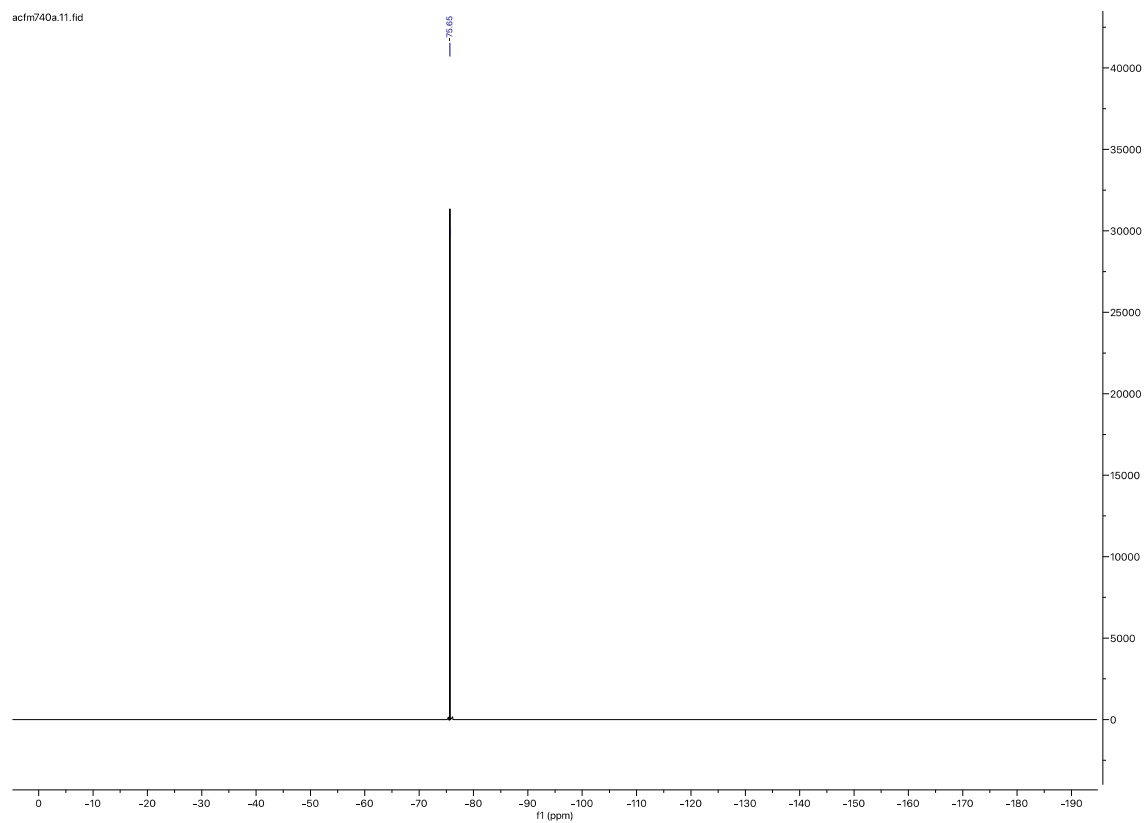

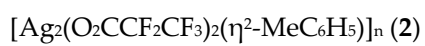

$^1\text{H}$  NMR ( $\text{CD}_2\text{Cl}_2$ )

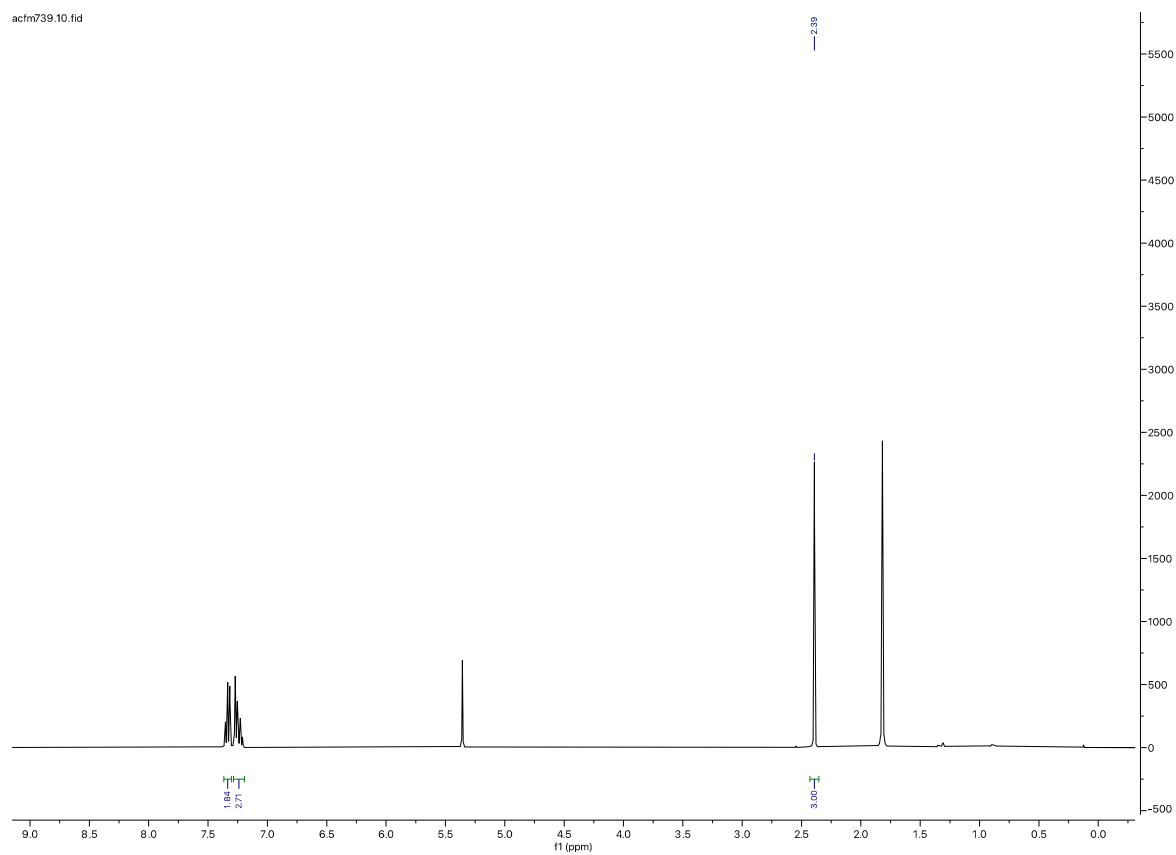

$^{19}\text{F}$  NMR ( $\text{CD}_2\text{Cl}_2$ )

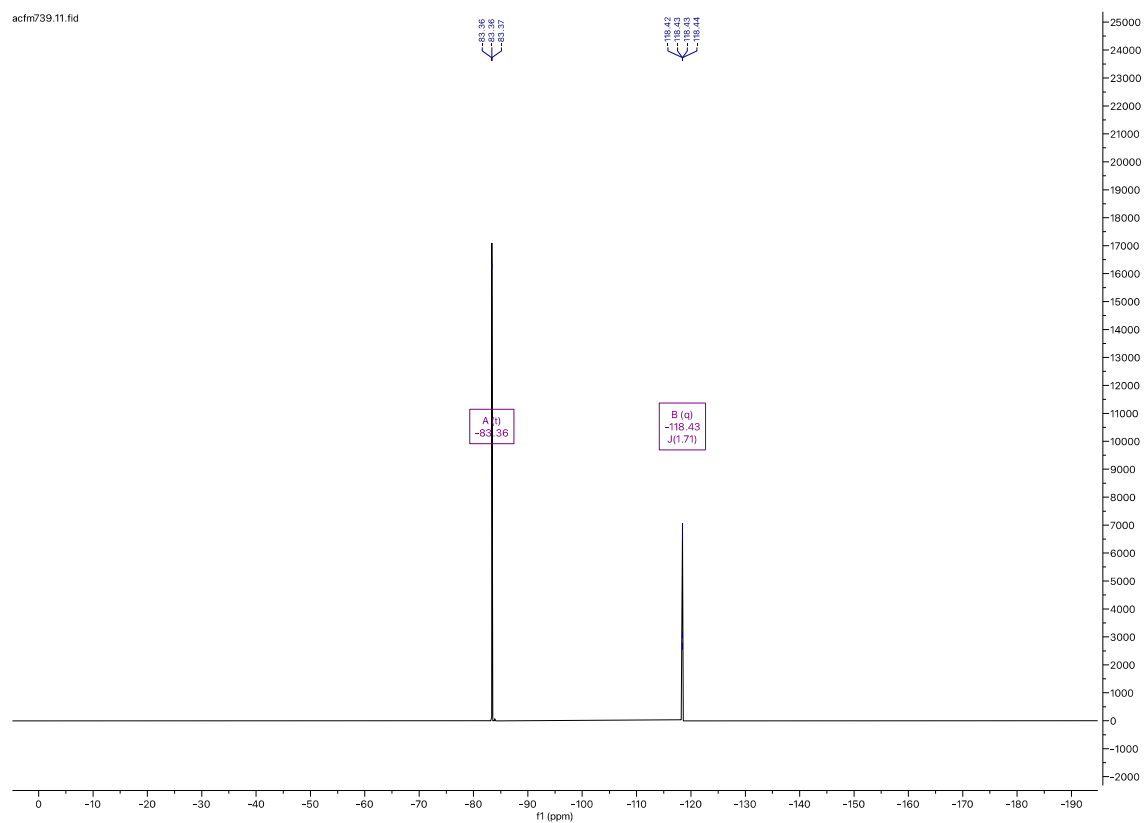

# $^{19}\text{F}$ NMR ( $\text{C}_6\text{D}_6$ )

acfm734.11.fid

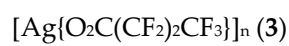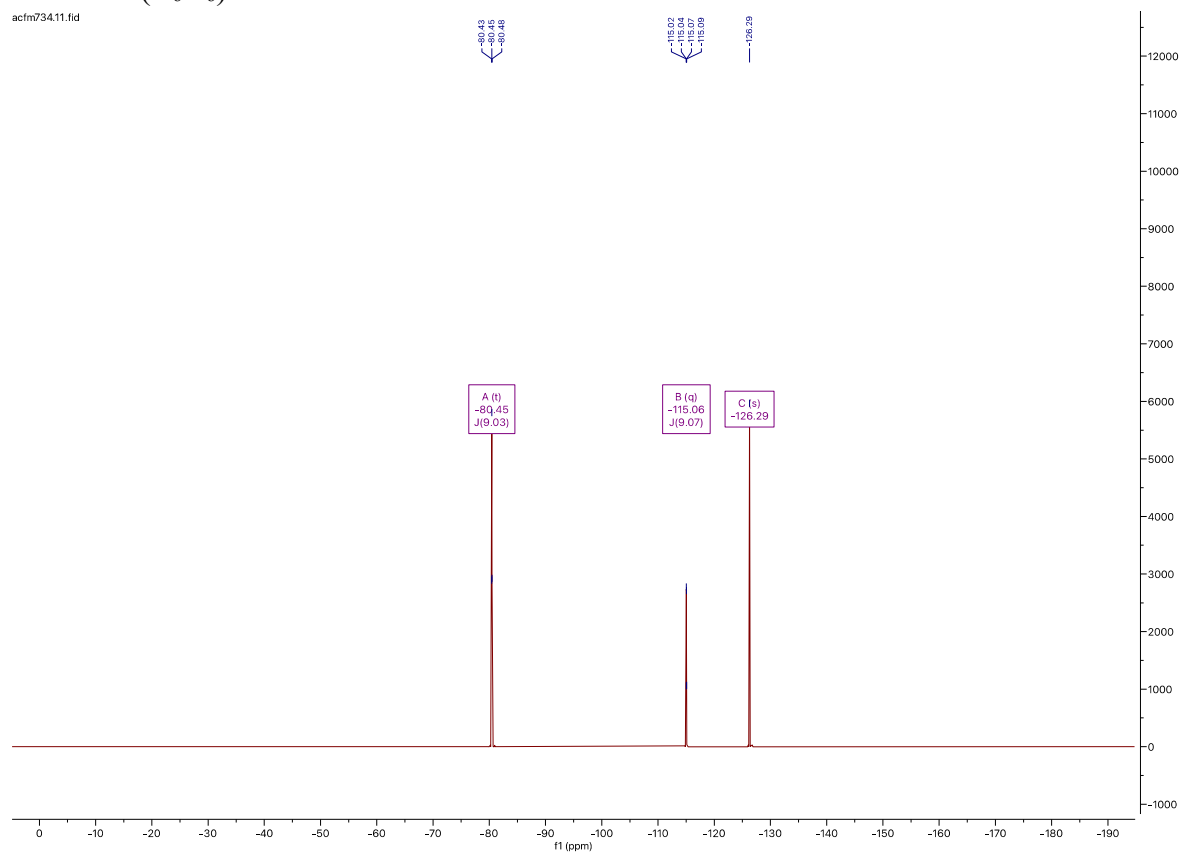

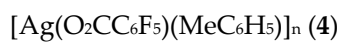

$^1\text{H}$  NMR ( $\text{CD}_2\text{Cl}_2$ )

acfm742b.10.fid

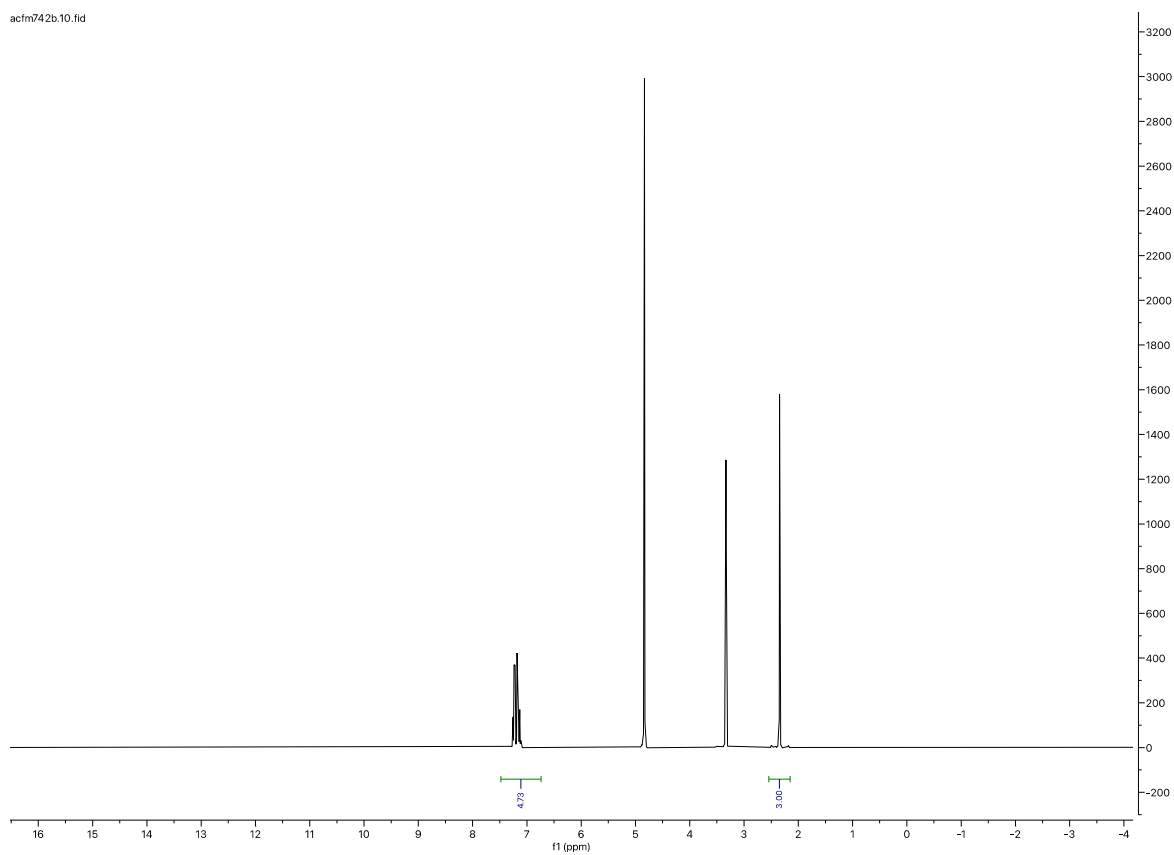

$^{19}\text{F}$  NMR ( $\text{CD}_2\text{Cl}_2$ )

acfm742b.12.fid

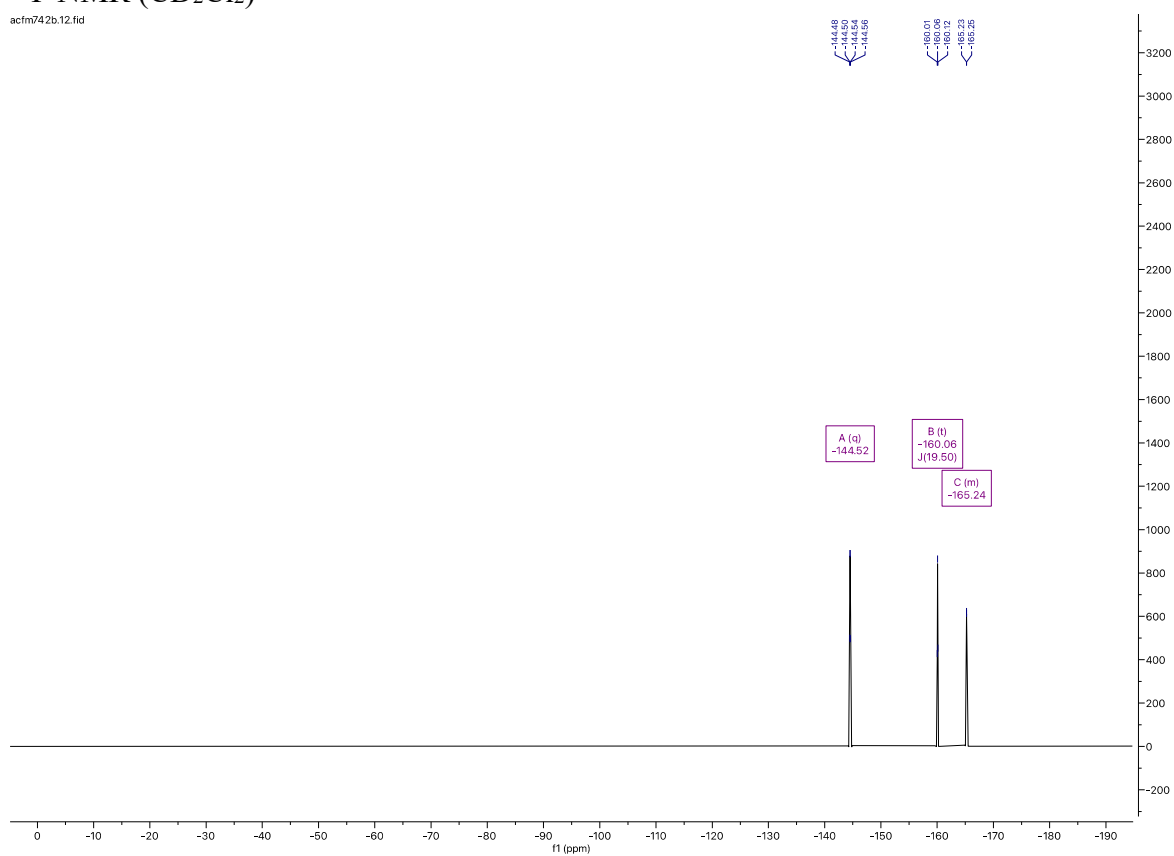

$^{19}\text{F}$  NMR ( $\text{CD}_3\text{OD}$ )

acfm741a.11.fid

$[\text{Ag}(\text{O}_3\text{SCF}_3)]_n$  (5)

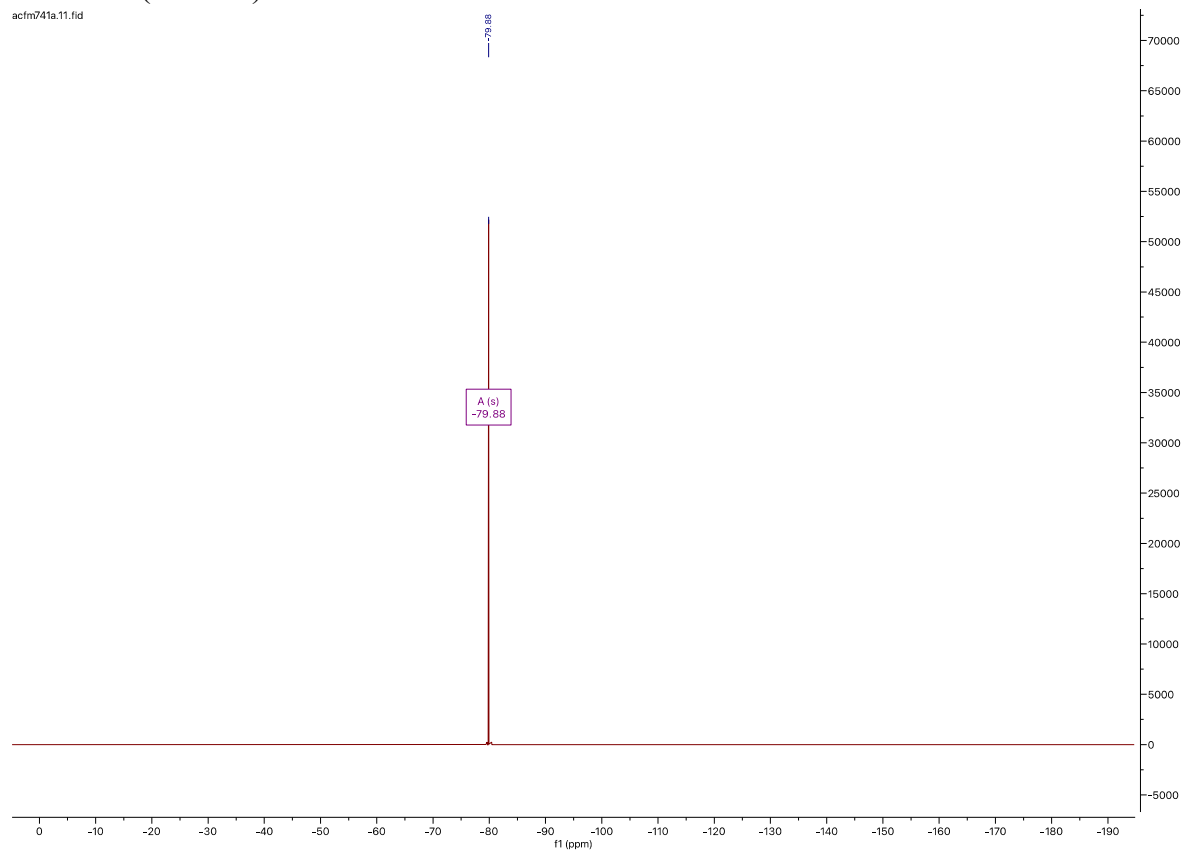

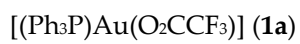

$^1\text{H}$  NMR ( $\text{CD}_2\text{Cl}_2$ )

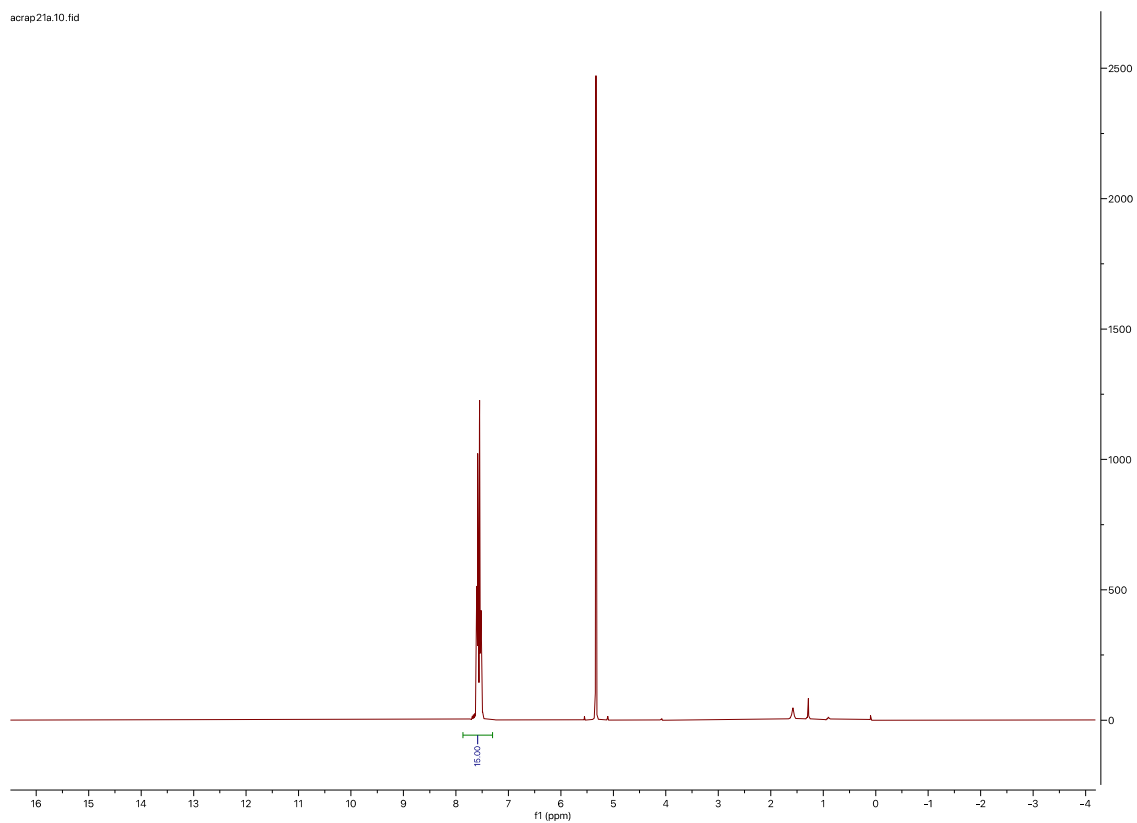

$^{31}\text{P}\{^1\text{H}\}$  NMR ( $\text{CD}_2\text{Cl}_2$ )

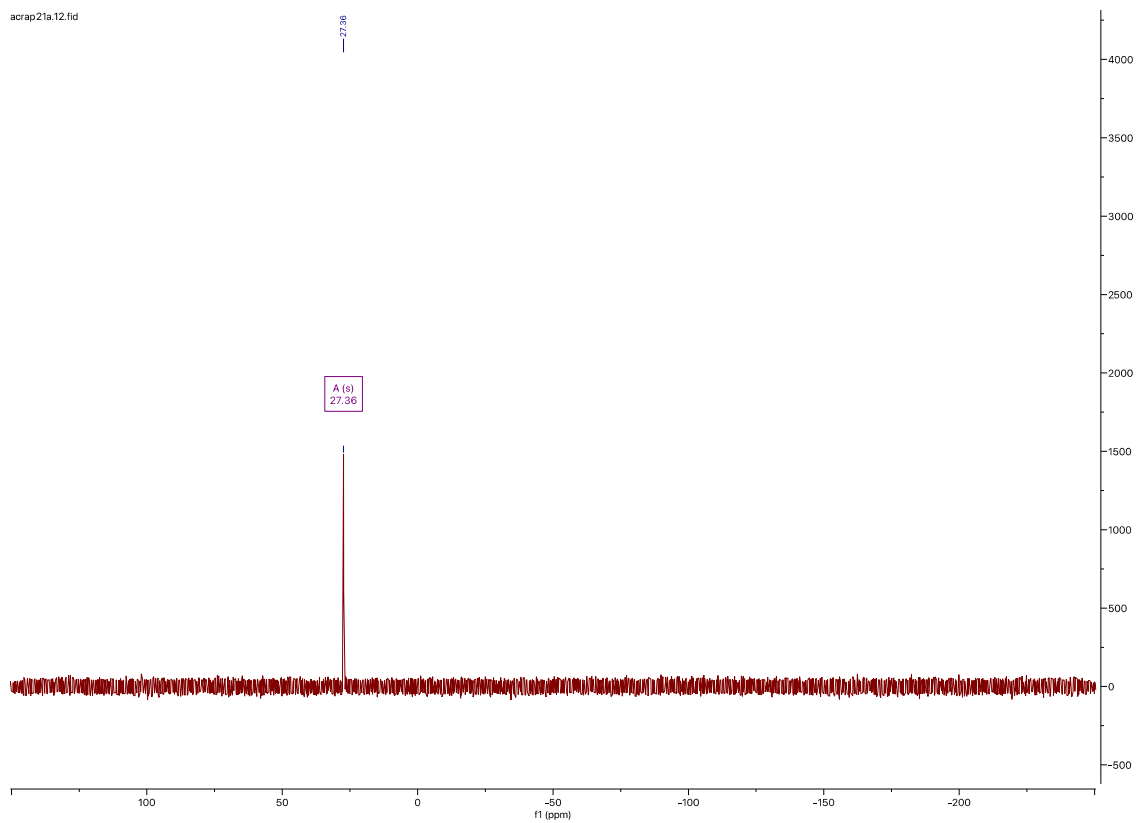

# $^{19}\text{F}$ NMR ( $\text{CD}_2\text{Cl}_2$ )

acrap21a.11.fid

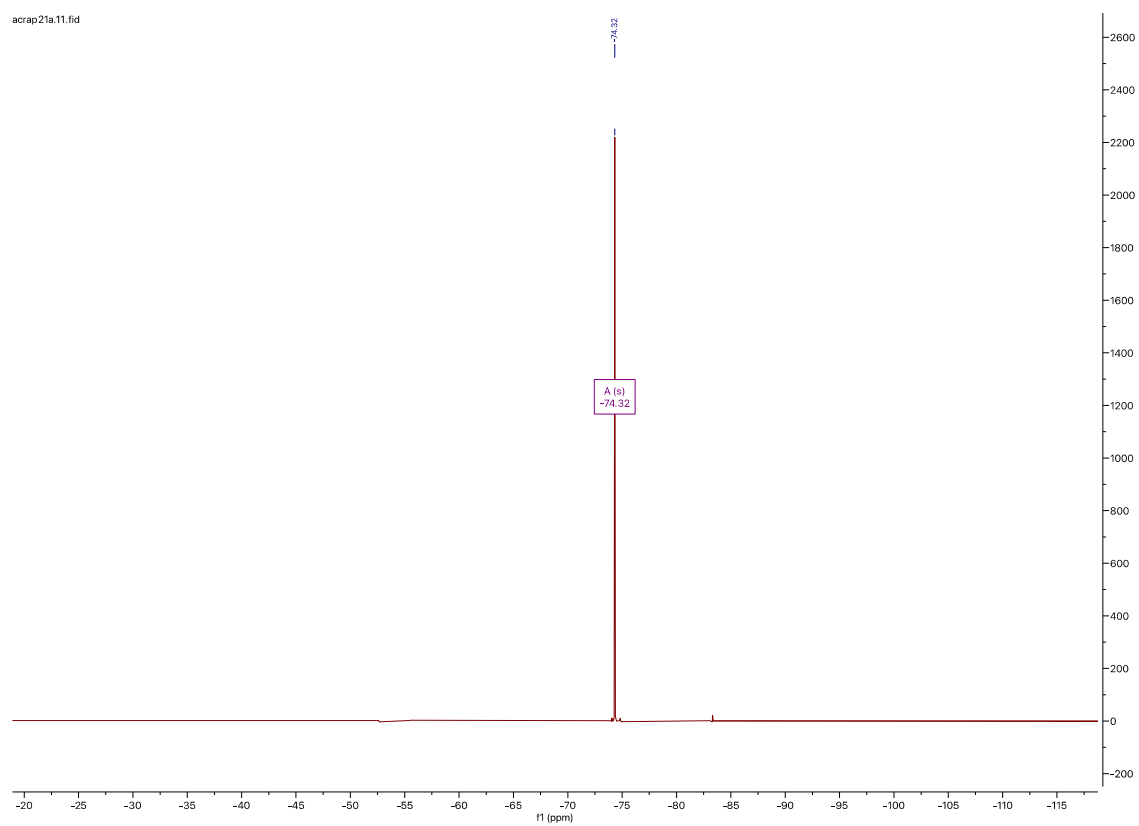



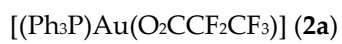

$^1\text{H}$  NMR ( $\text{CD}_2\text{Cl}_2$ )

acrap21a.10.fid

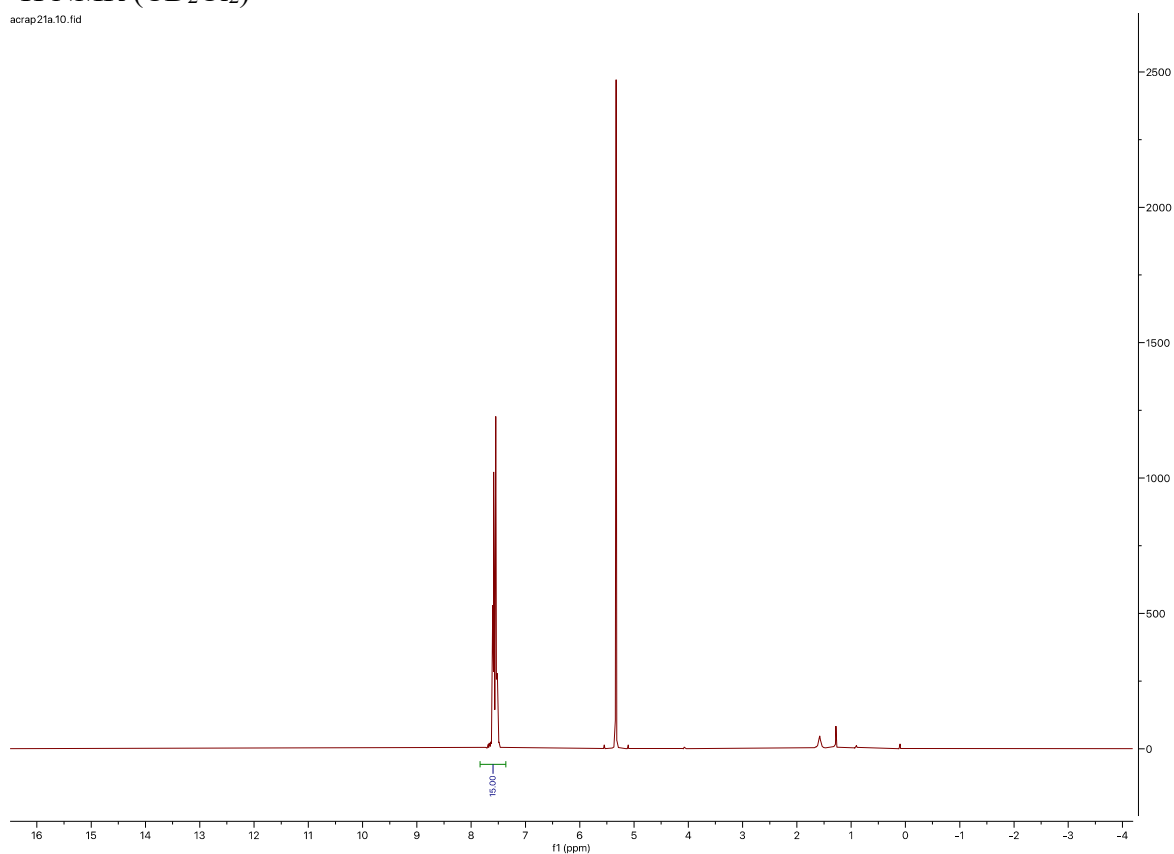

$^{31}\text{P}\{^1\text{H}\}$  NMR ( $\text{CD}_2\text{Cl}_2$ )

acrap21a.12.fid

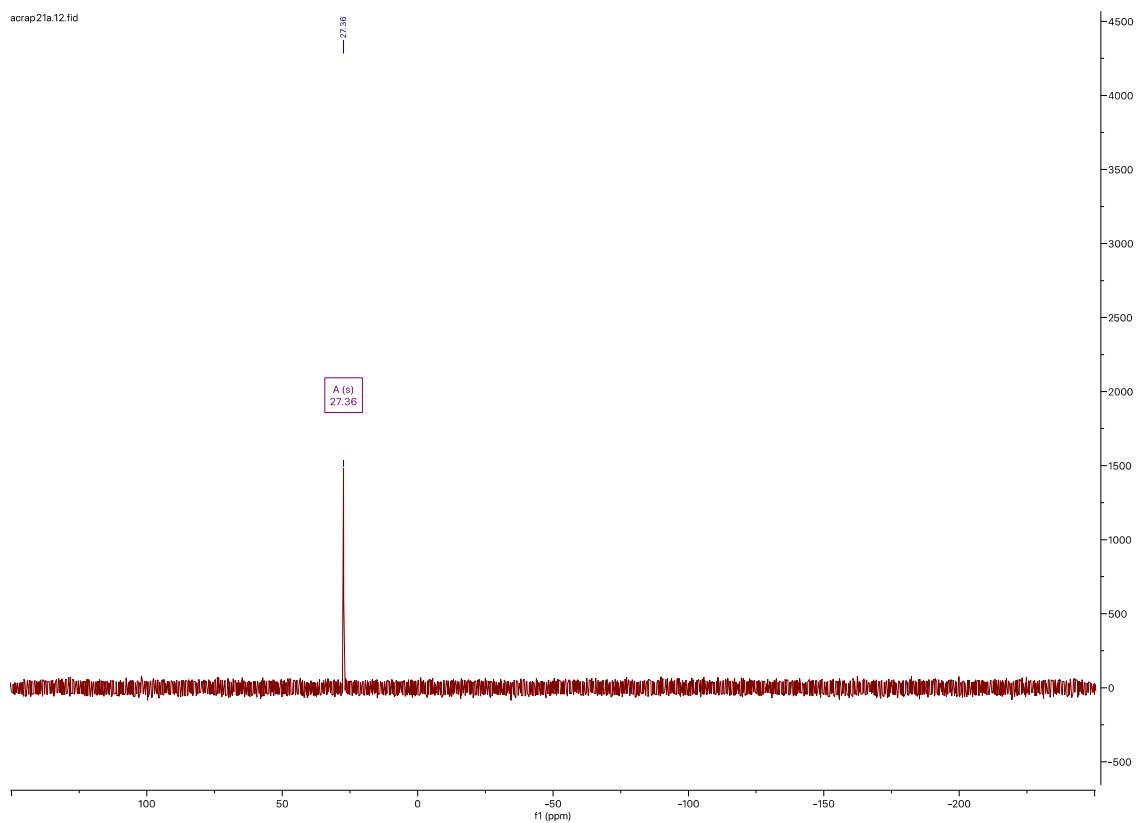

# $^{19}\text{F}$ NMR ( $\text{CD}_2\text{Cl}_2$ )

acrap21a.11.fid

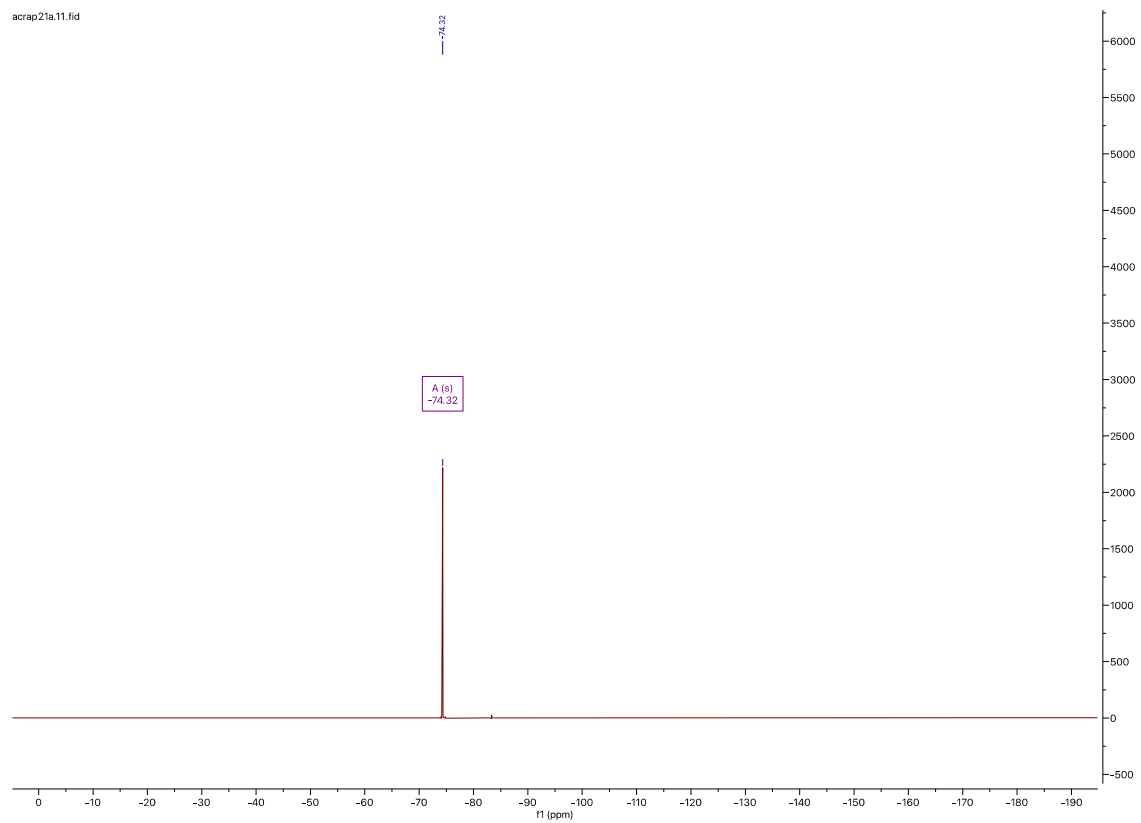

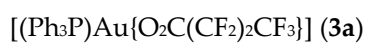

$^1\text{H}$  NMR ( $\text{CD}_2\text{Cl}_2$ )

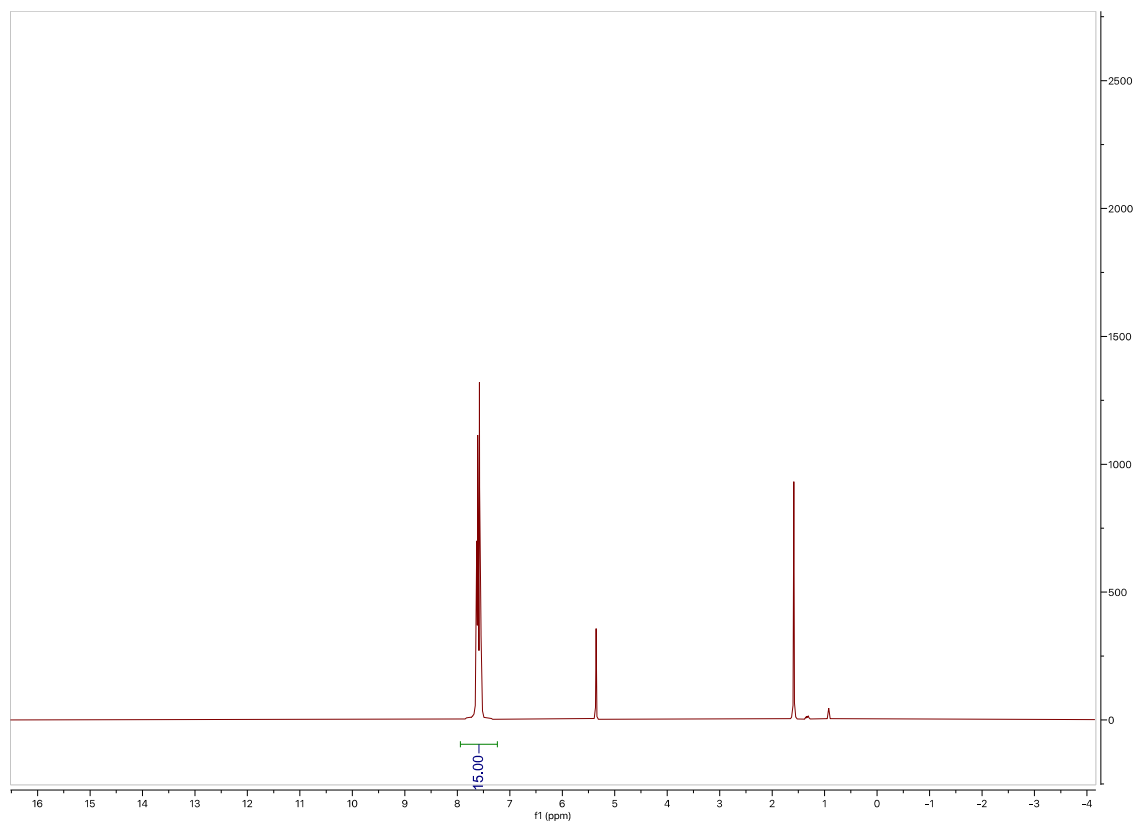

$^{31}\text{P}\{^1\text{H}\}$  NMR ( $\text{CD}_2\text{Cl}_2$ )

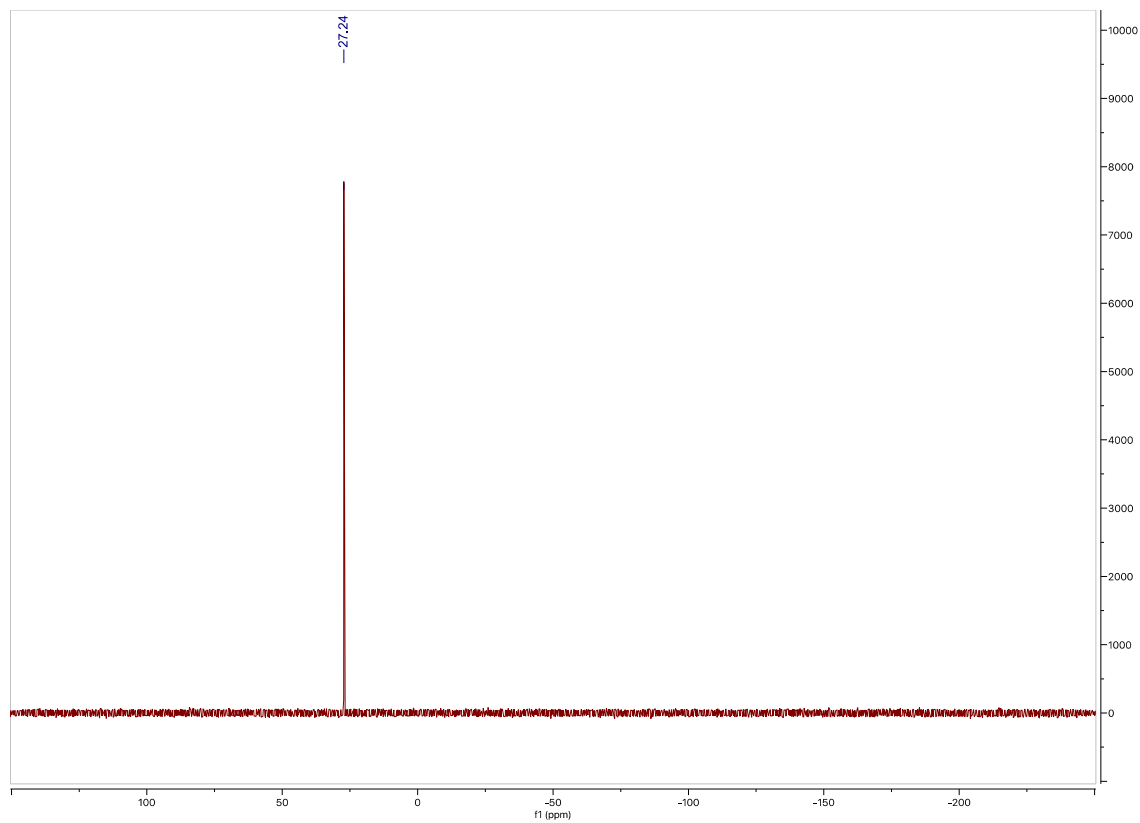

$^{19}\text{F}$  NMR ( $\text{CD}_2\text{Cl}_2$ )

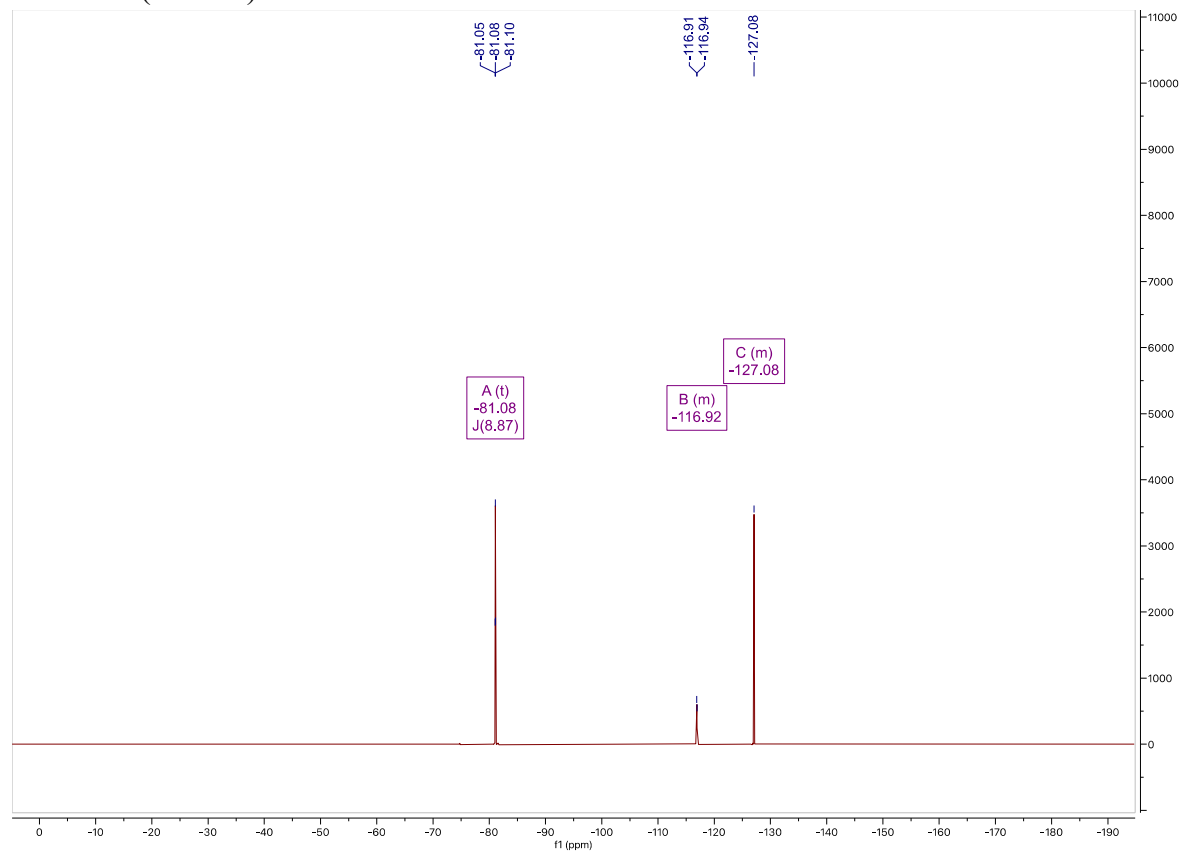

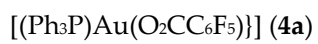

$^1\text{H}$  NMR ( $\text{CD}_2\text{Cl}_2$ )

acp22a.10.fid

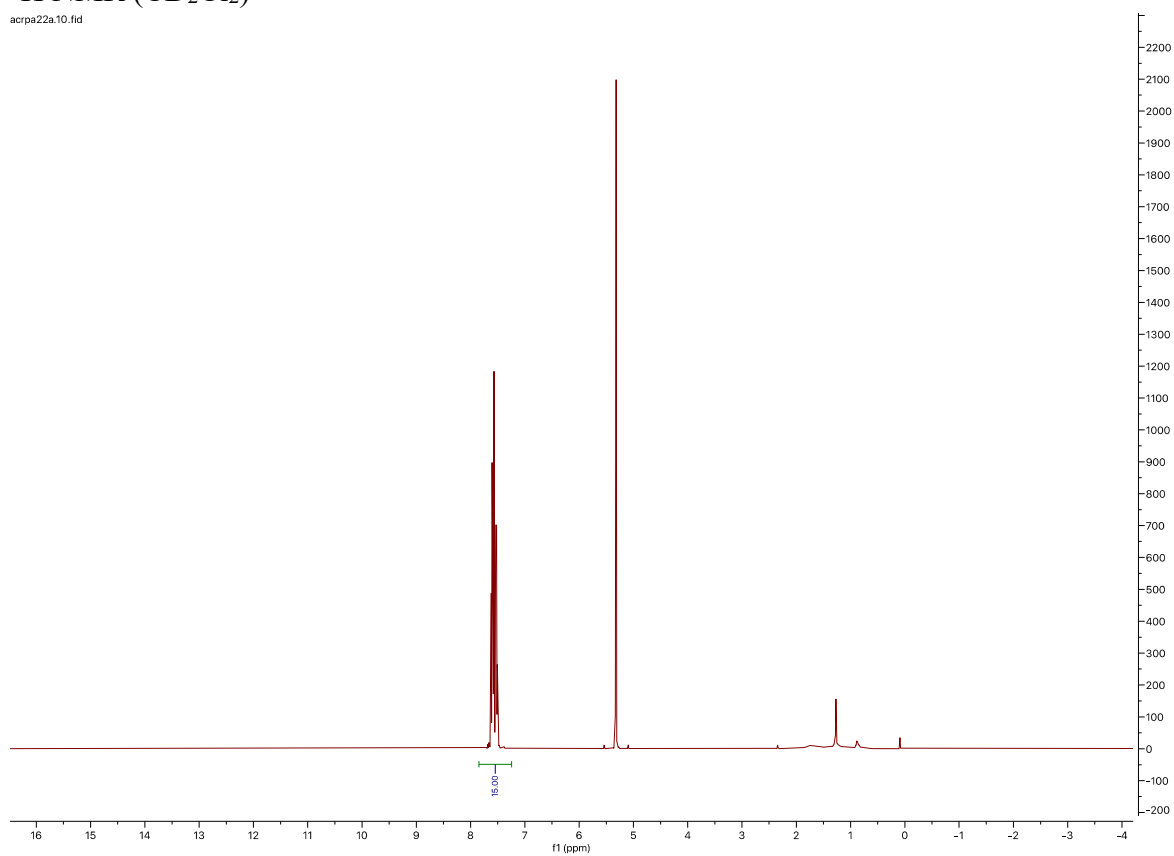

$^{31}\text{P}\{^1\text{H}\}$  NMR ( $\text{CD}_2\text{Cl}_2$ )

acp22a.12.fid

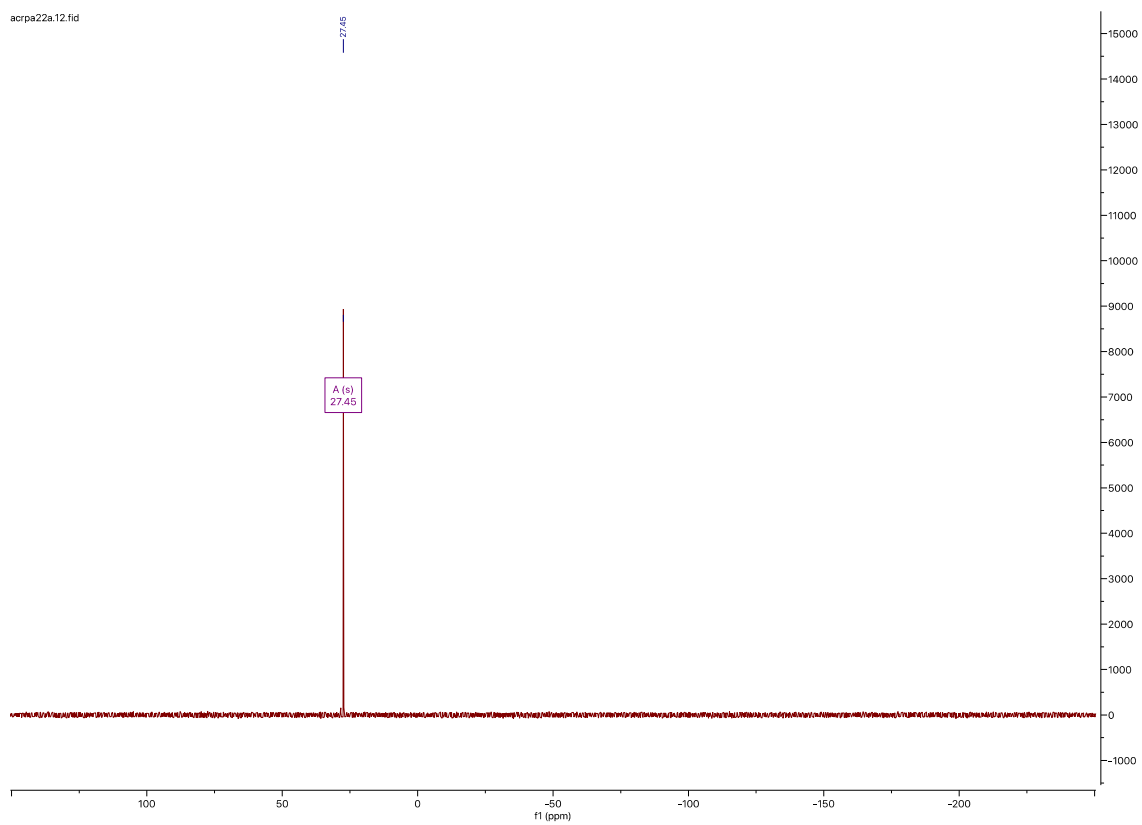

# $^{19}\text{F}$ NMR ( $\text{CD}_2\text{Cl}_2$ )

acp2a22a.11.fid

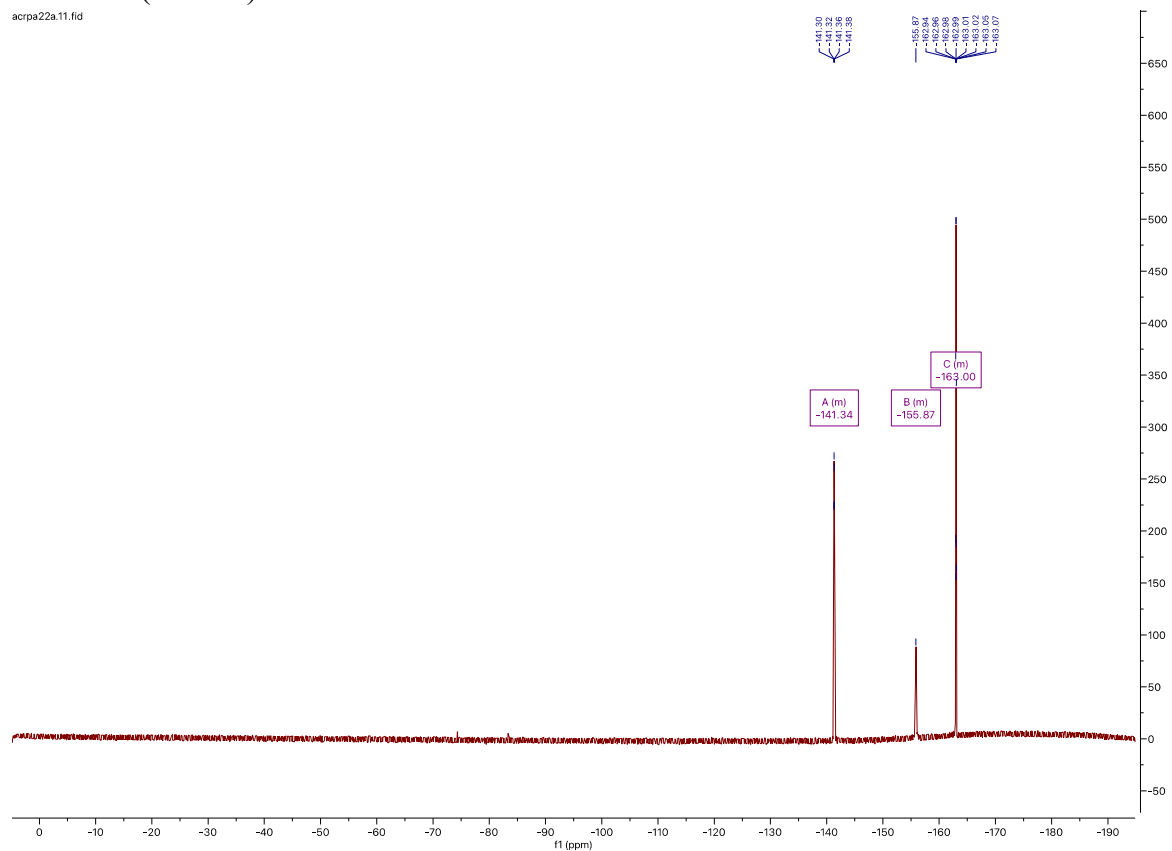

[(dppb)(AuO<sub>2</sub>CCF<sub>3</sub>)<sub>2</sub>] (**5a**)

<sup>31</sup>P{<sup>1</sup>H} NMR (CD<sub>2</sub>Cl<sub>2</sub>)

acrap61a.12.fid

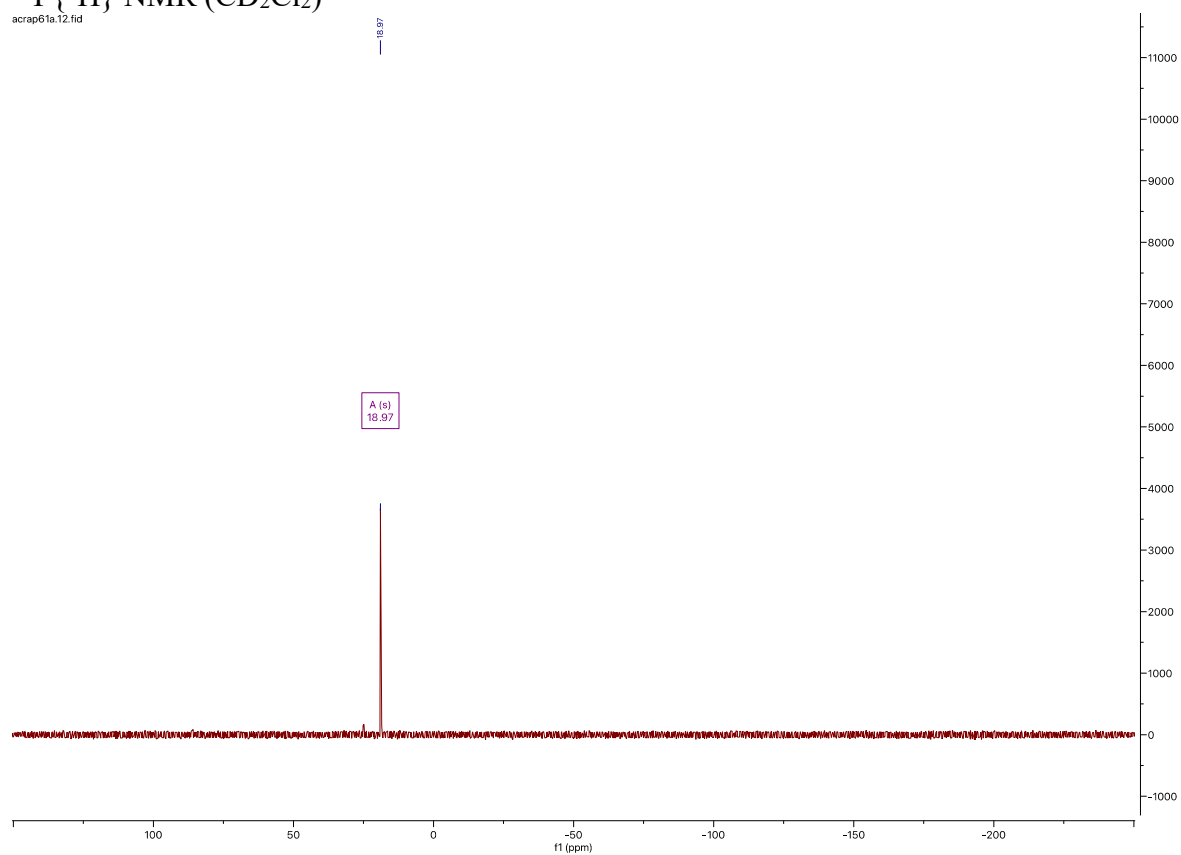

<sup>19</sup>F NMR (CD<sub>2</sub>Cl<sub>2</sub>)

acrap61a.11.fid

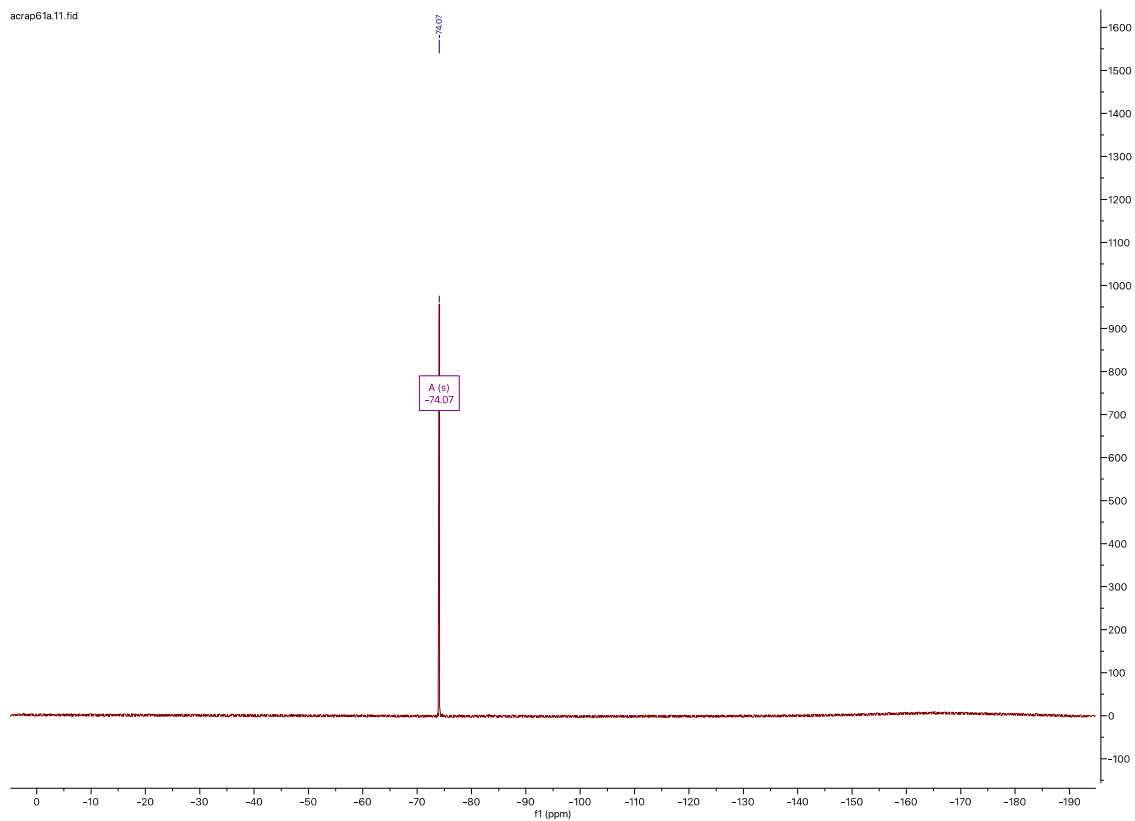

$^{31}\text{P}\{^1\text{H}\}$  NMR ( $\text{CD}_2\text{Cl}_2$ )

acrap62a.t2.fid

$[(\text{dppb})(\text{AuO}_2\text{CC}_6\text{F}_5)_2]$  (**6a**)

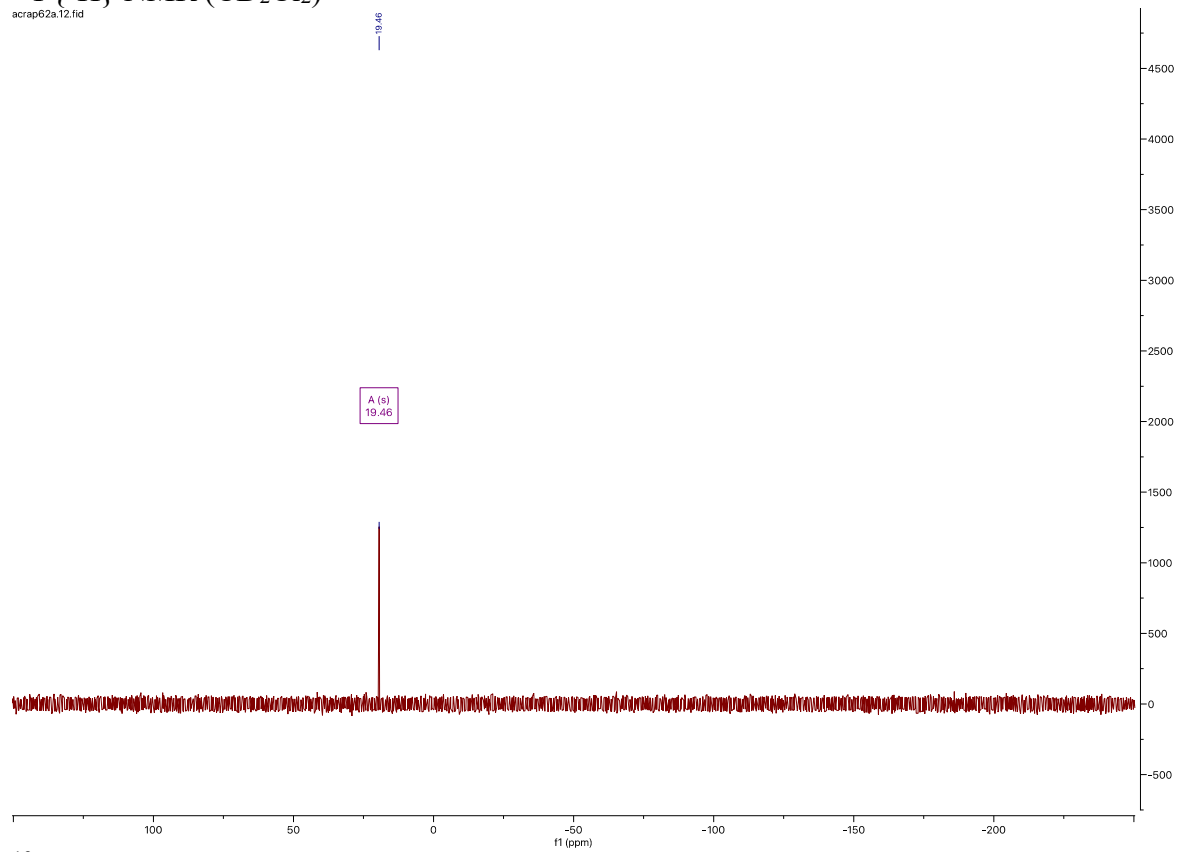

$^{19}\text{F}$  NMR ( $\text{CD}_2\text{Cl}_2$ )

acrap62a.t1.fid

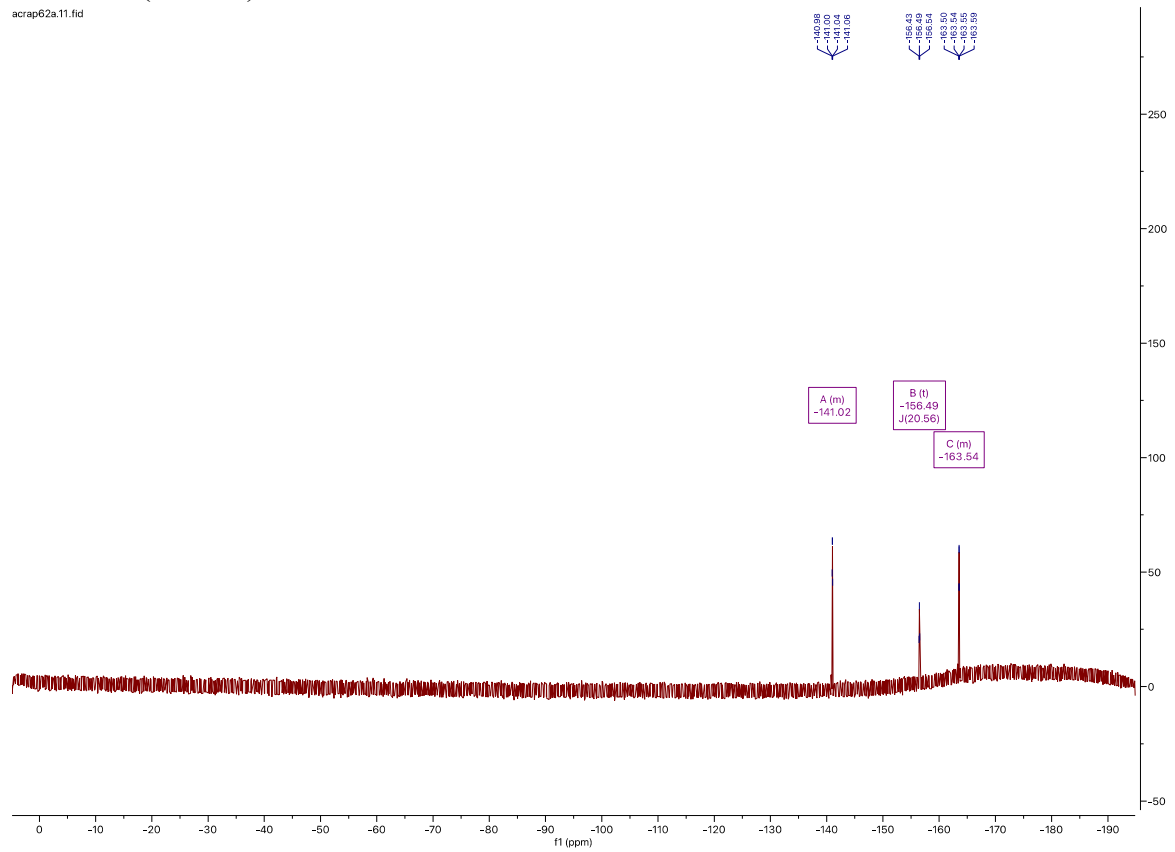



$^{31}\text{P}\{^1\text{H}\}$  NMR ( $\text{CD}_2\text{Cl}_2$ )

acrap40a.12.fid

$[(\text{Xantphos})(\text{AuO}_2\text{CCF}_2\text{CF}_3)_2]$  (**7a**)

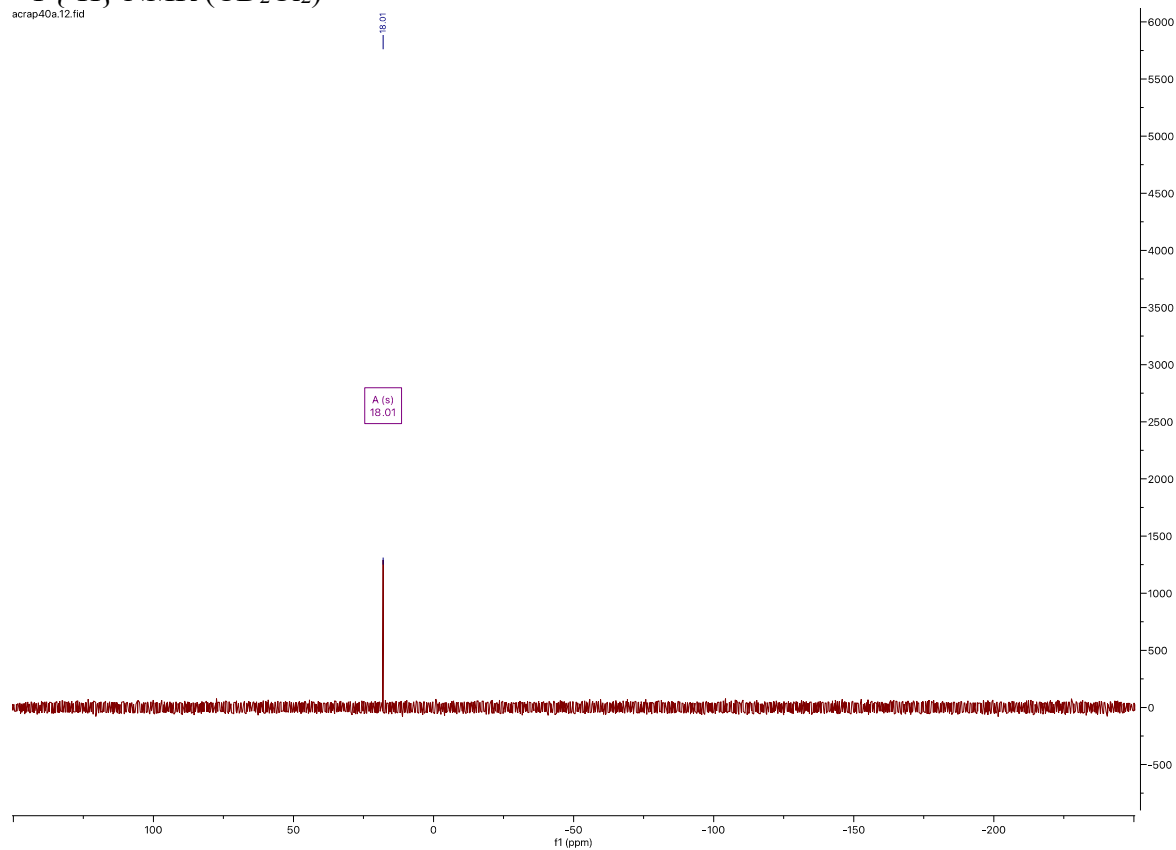

$^{19}\text{F}$  NMR ( $\text{CD}_2\text{Cl}_2$ )

acrap40a.11.fid

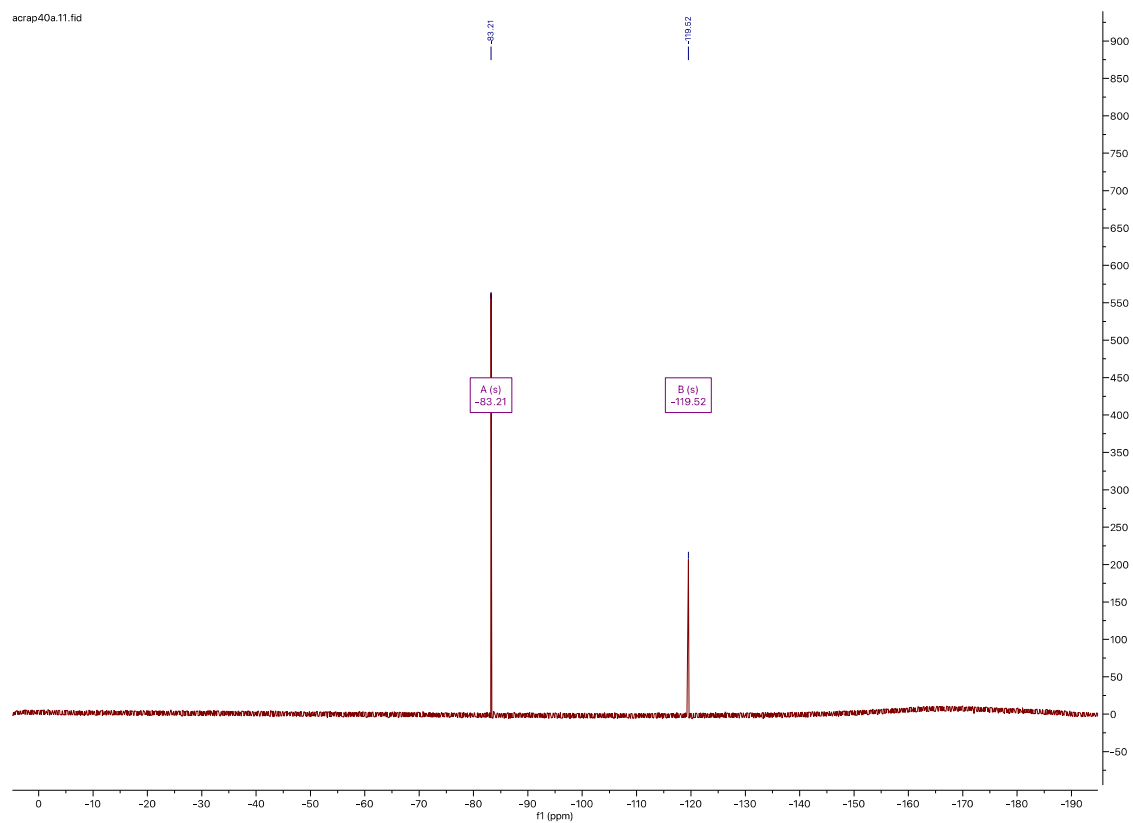

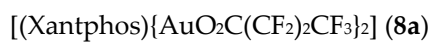

$^{31}\text{P}\{^1\text{H}\}$  NMR ( $\text{CD}_2\text{Cl}_2$ )

acrap43a.t2.fid

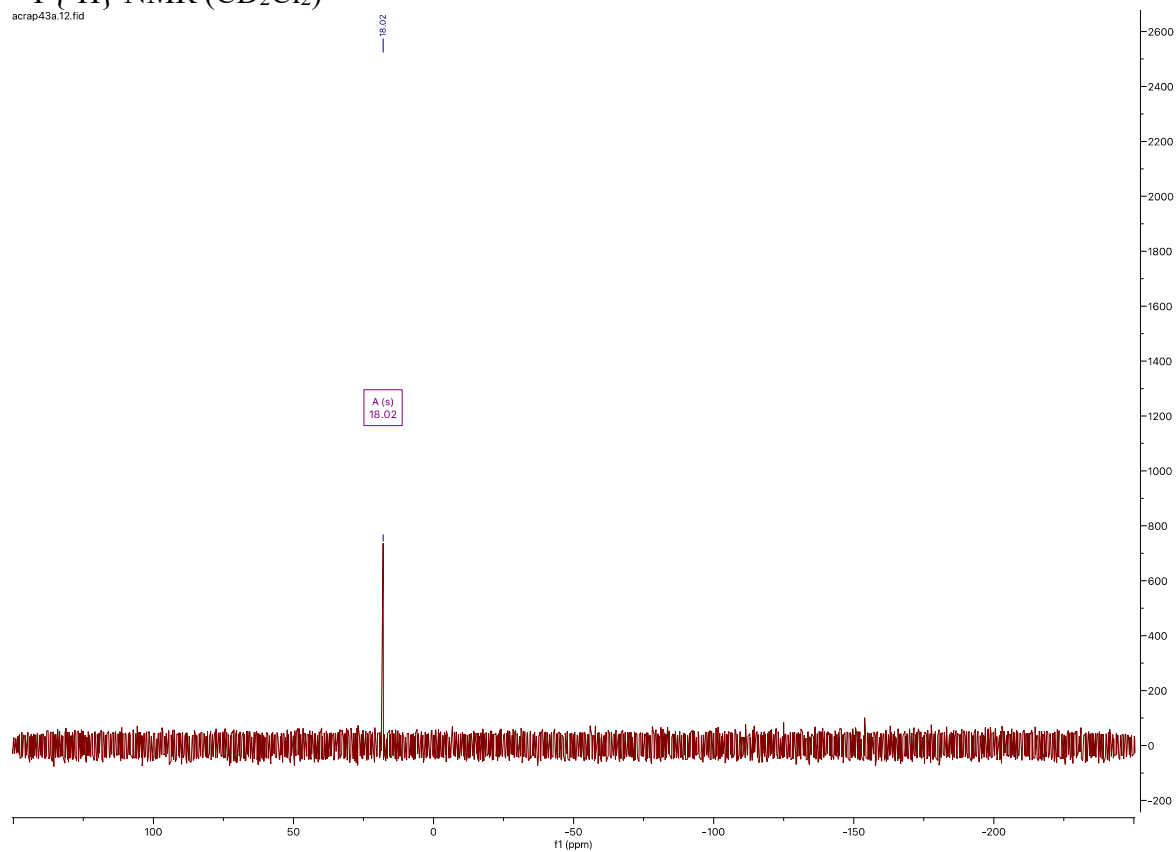

$^{19}\text{F}$  NMR ( $\text{CD}_2\text{Cl}_2$ )

acrap43a.t1.fid

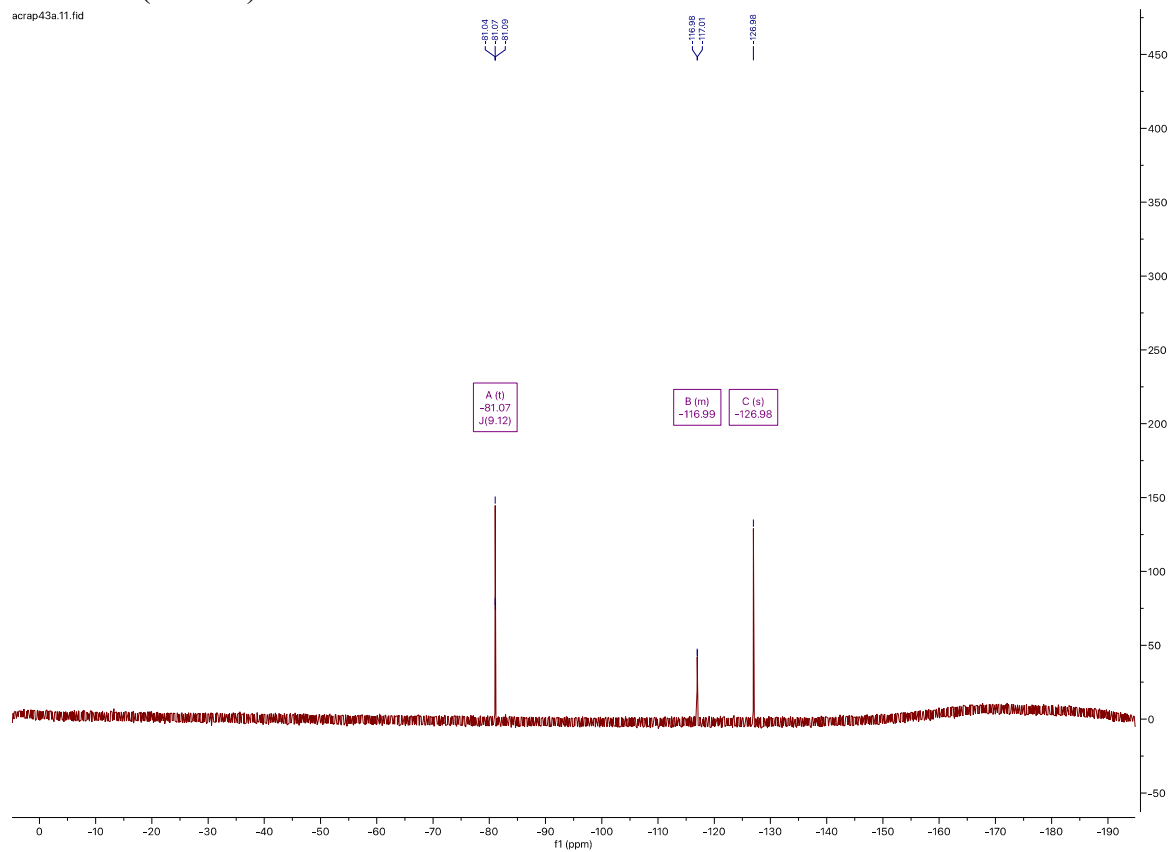

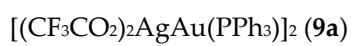

$^1\text{H}$  NMR ( $\text{CD}_2\text{Cl}_2$ )

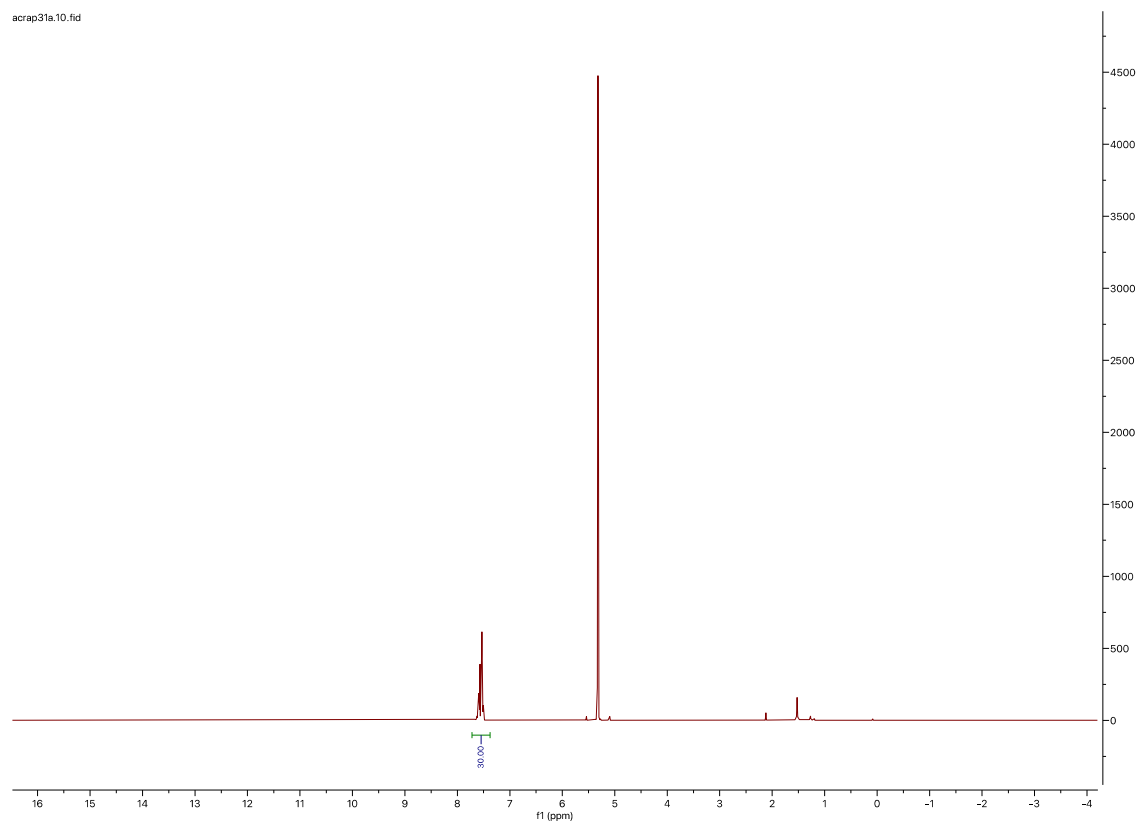

$^{31}\text{P}\{^1\text{H}\}$  NMR ( $\text{CD}_2\text{Cl}_2$ )

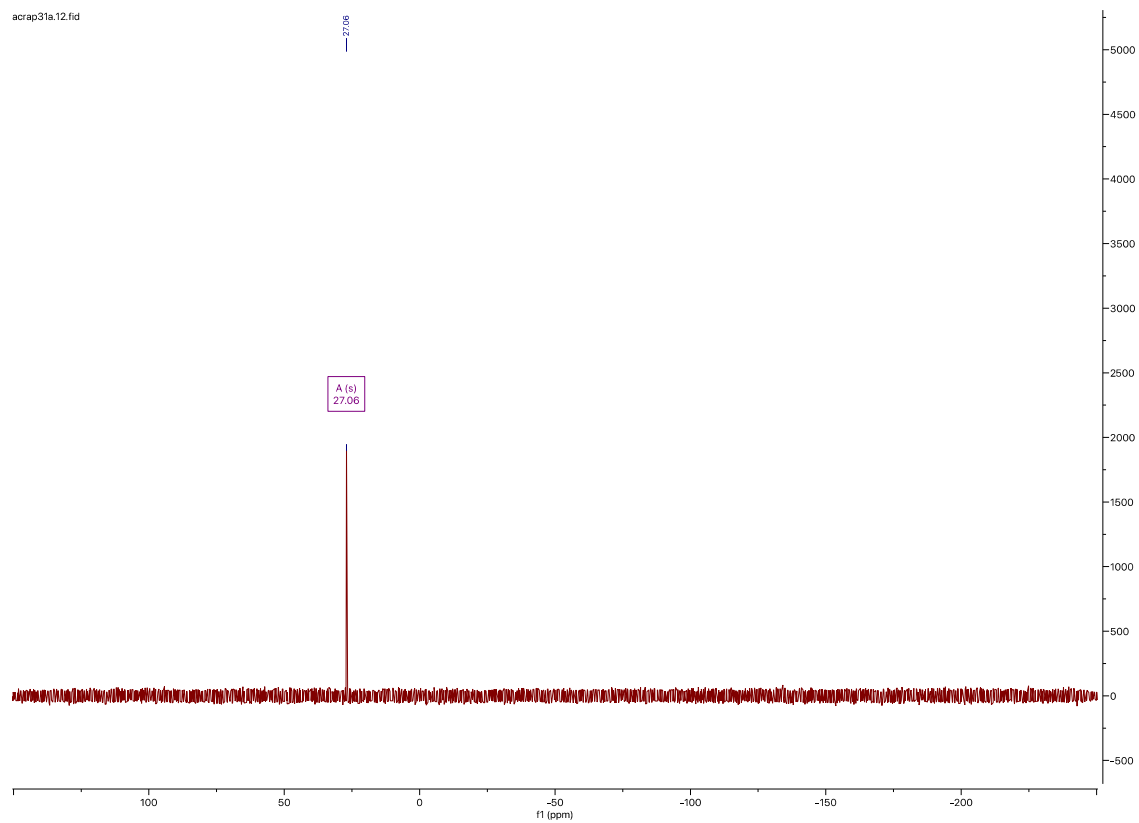

# $^{19}\text{F}$ NMR ( $\text{CD}_2\text{Cl}_2$ )

acrap31a.11.fid

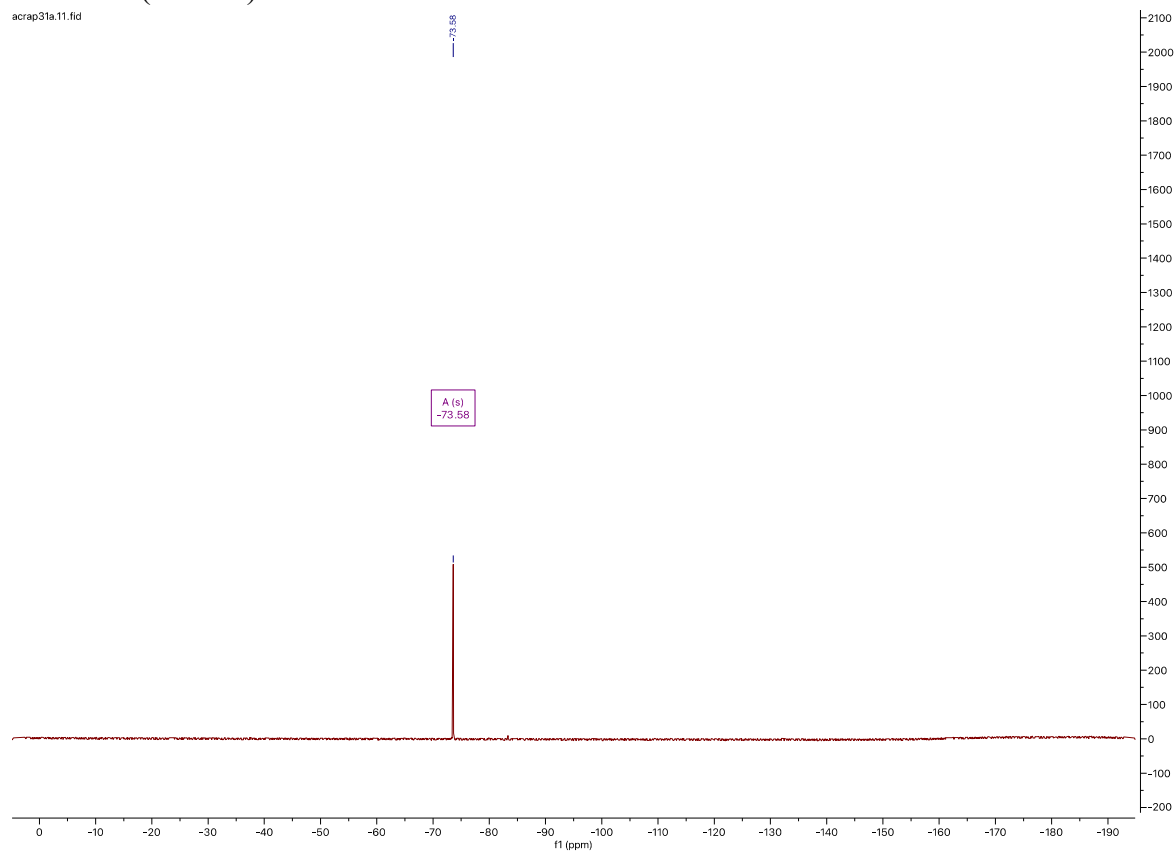

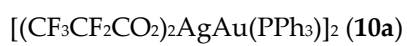

$^1\text{H}$  NMR ( $\text{CD}_2\text{Cl}_2$ )

acrap30a.10.fid

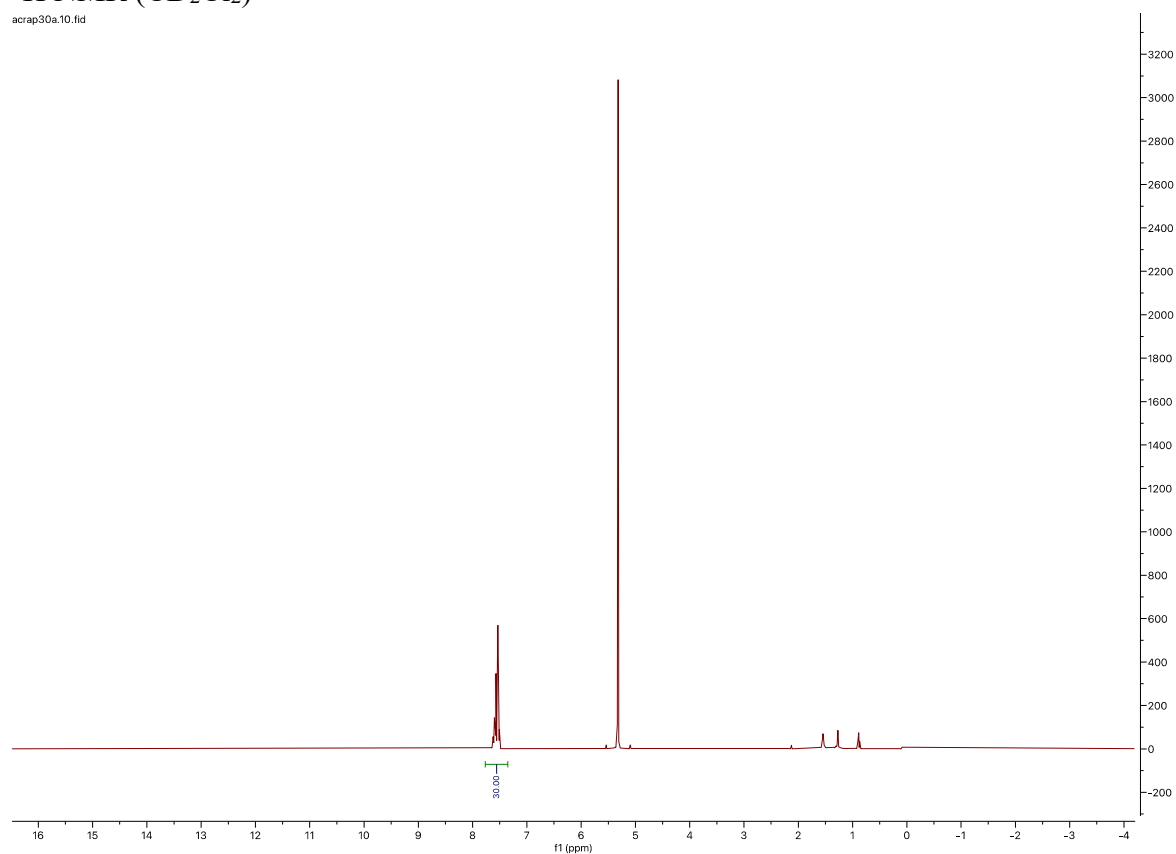

$^{31}\text{P}\{^1\text{H}\}$  NMR ( $\text{CD}_2\text{Cl}_2$ )

acrap30a.12.fid

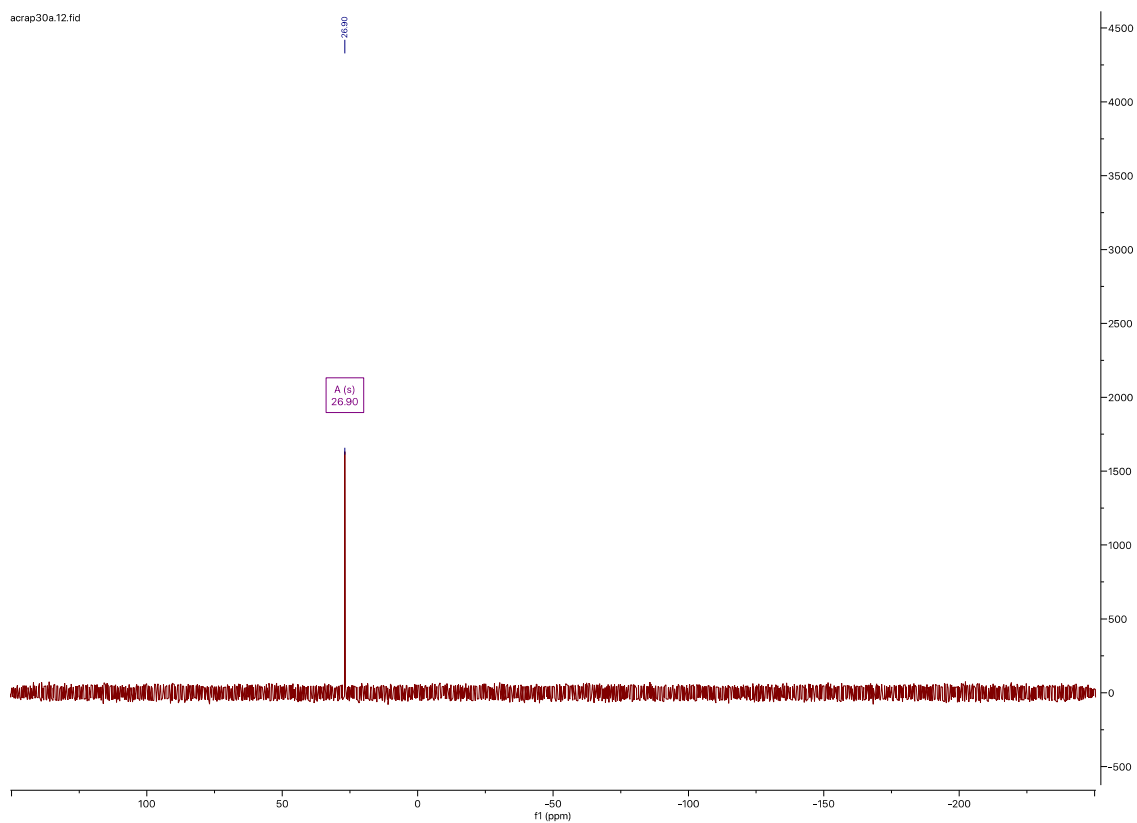

# $^{19}\text{F}$ NMR ( $\text{CD}_2\text{Cl}_2$ )

acrap30a.t1.fid

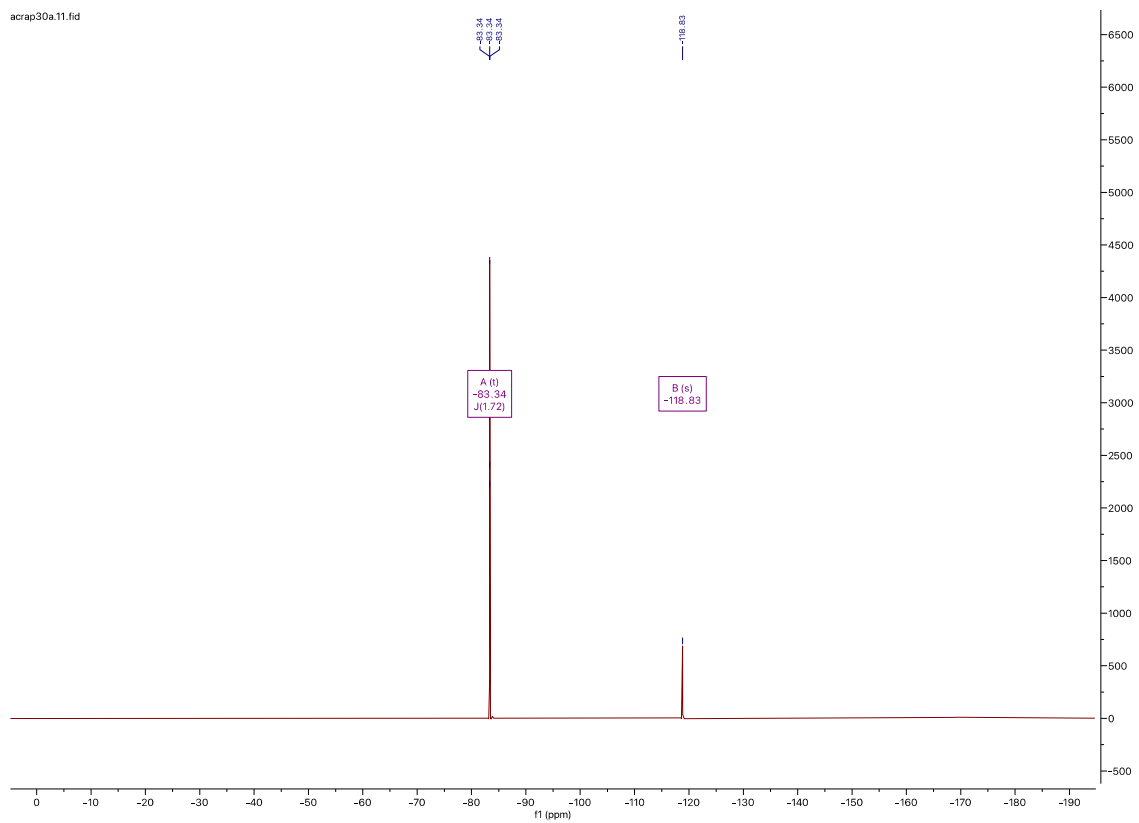

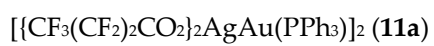

$^1\text{H}$  NMR ( $\text{CD}_2\text{Cl}_2$ )

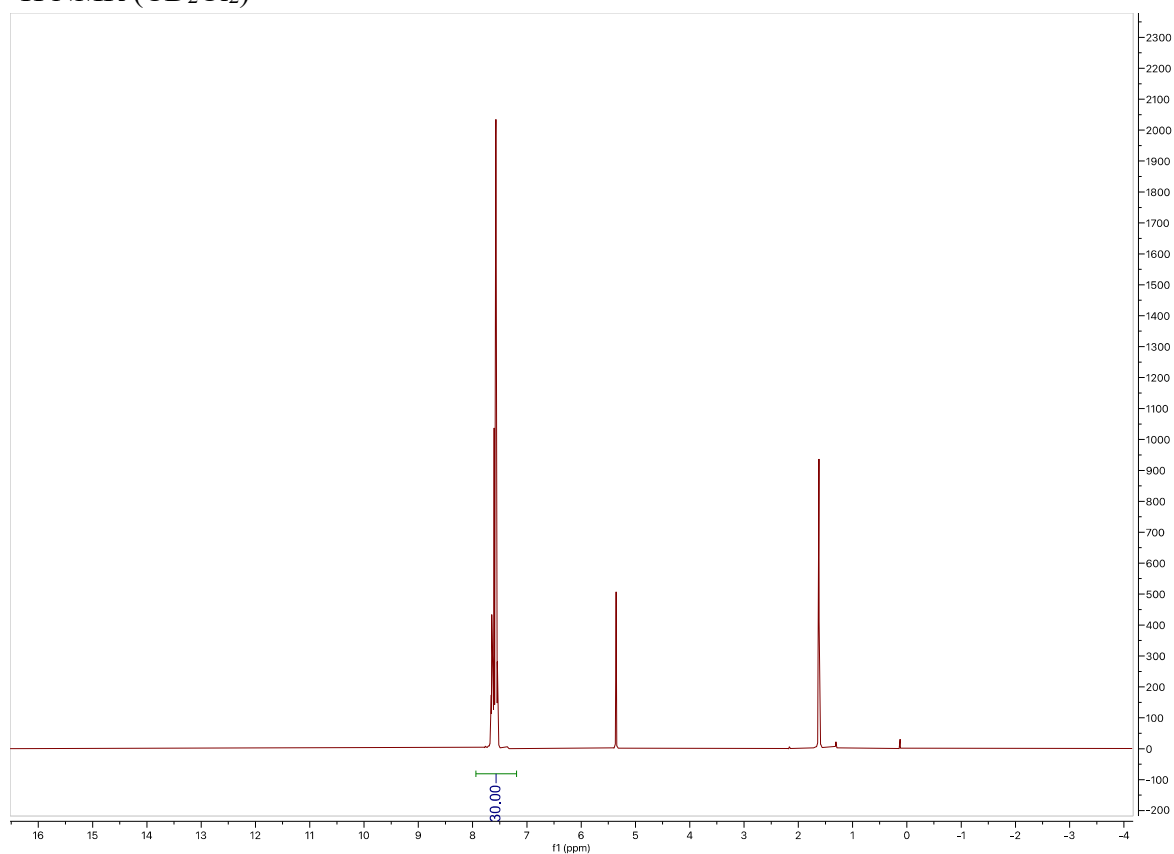

$^{31}\text{P}\{^1\text{H}\}$  NMR ( $\text{CD}_2\text{Cl}_2$ )

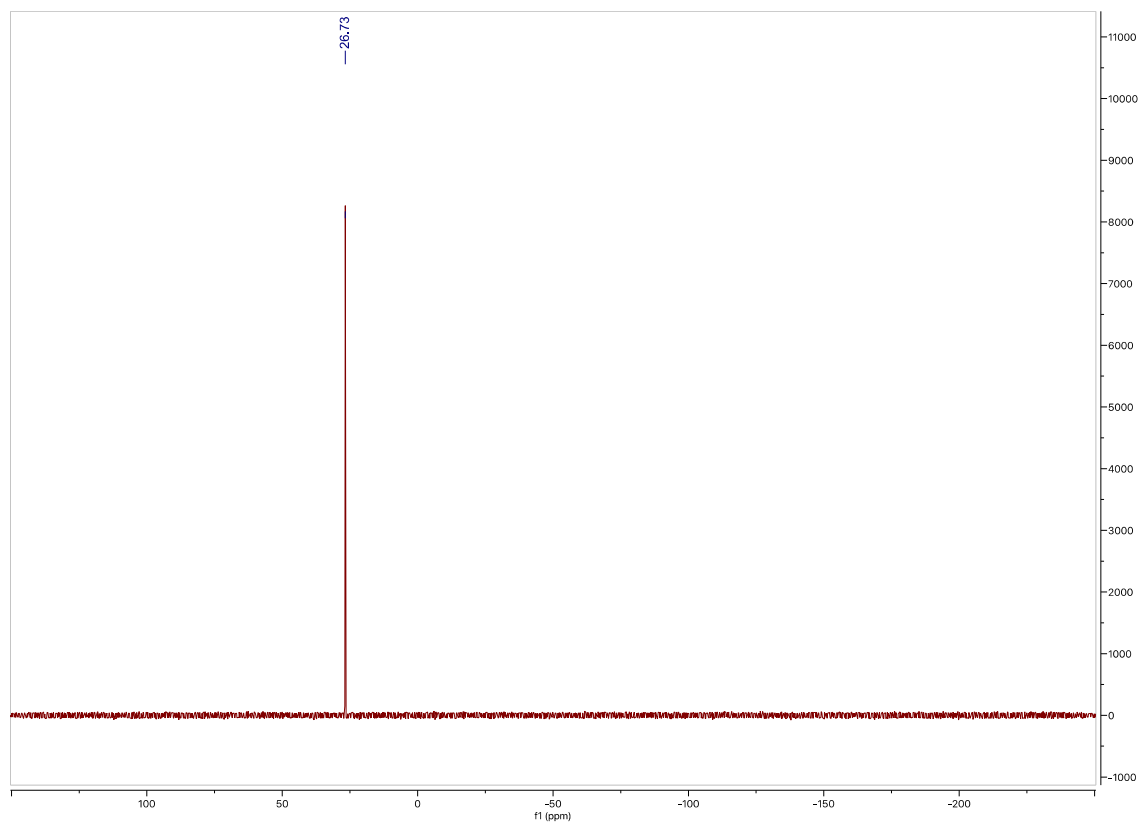

$^{19}\text{F}$  NMR ( $\text{CD}_2\text{Cl}_2$ )

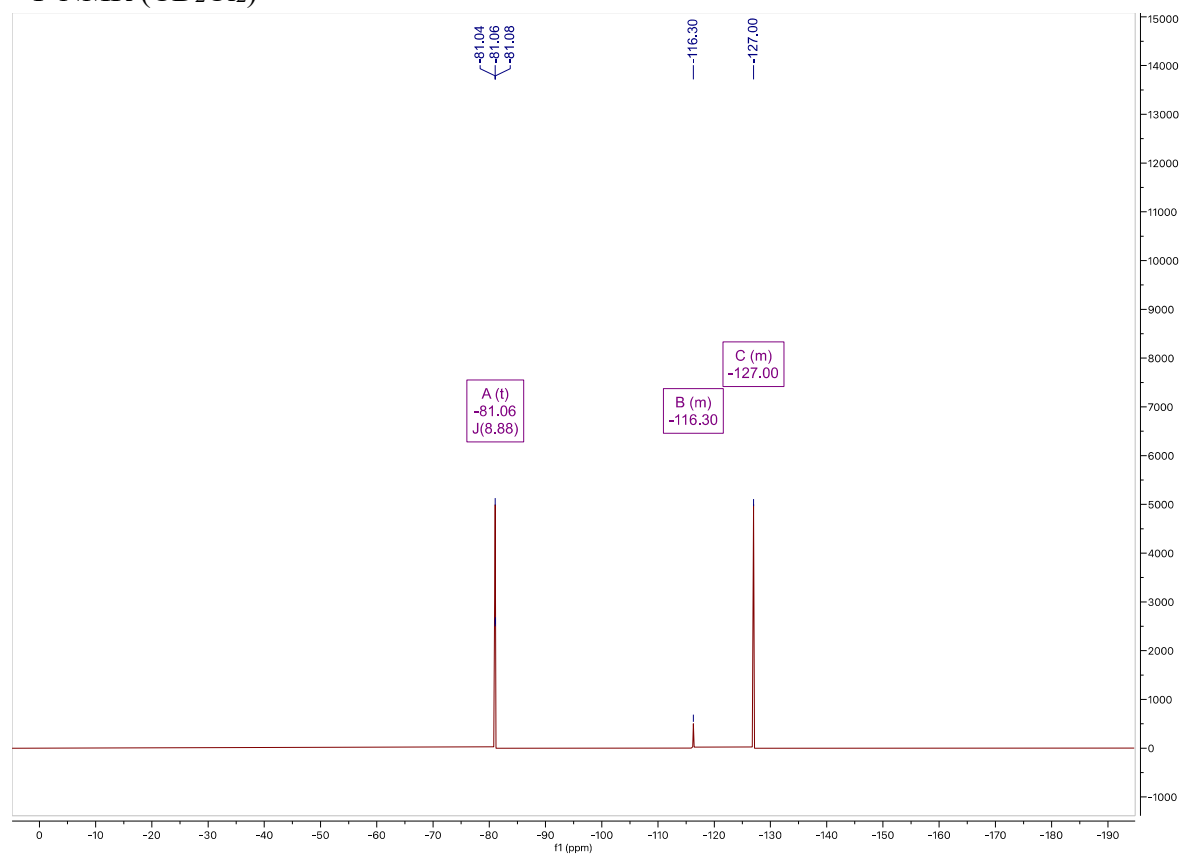



$^{31}\text{P}\{^1\text{H}\}$  NMR ( $\text{CD}_2\text{Cl}_2$ )

$[(\text{CF}_3\text{CO}_2)_2\text{AgAu}(\text{dppb})]_2$  (**12a**)

acrap71a.12.fid

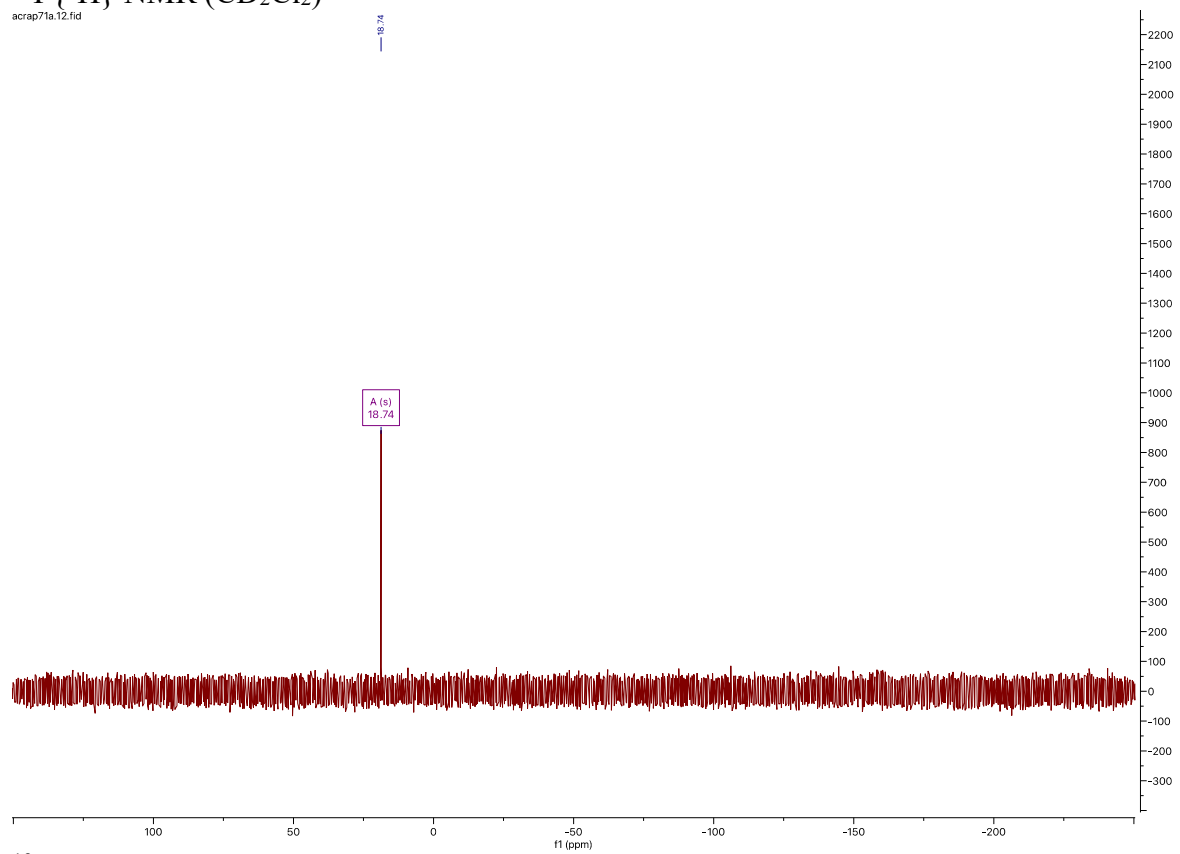

$^{19}\text{F}$  NMR ( $\text{CD}_2\text{Cl}_2$ )

acrap71a.11.fid

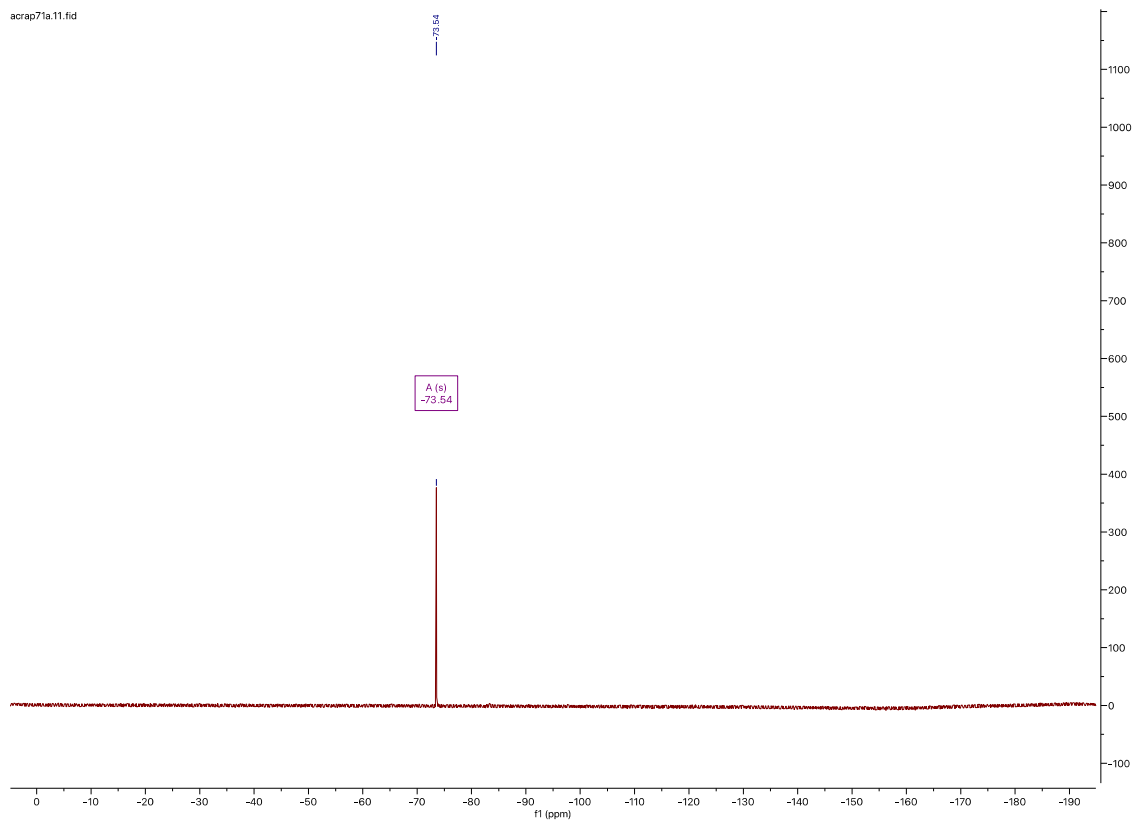

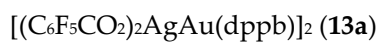

$^{31}P\{^1H\}$  NMR ( $CD_2Cl_2$ )

acrap72a.11.fid

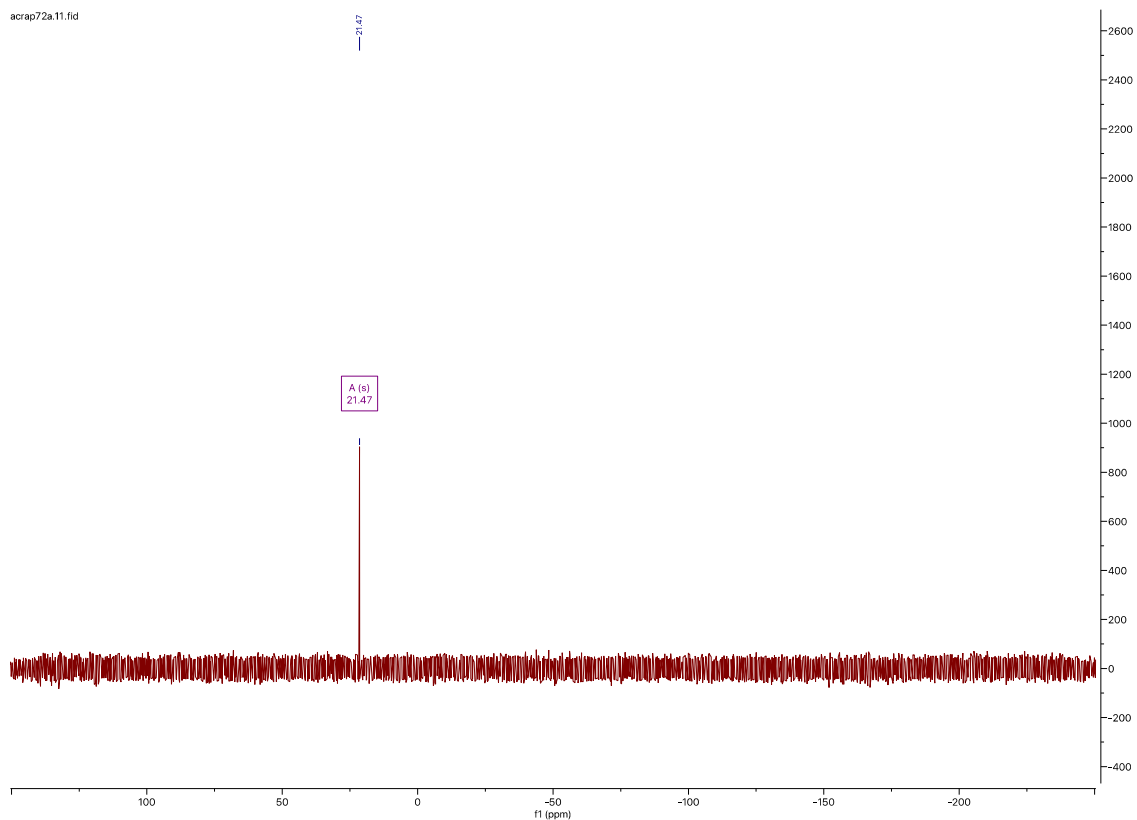

$^{19}F$  NMR ( $CD_2Cl_2$ )

acrap72a.12.fid

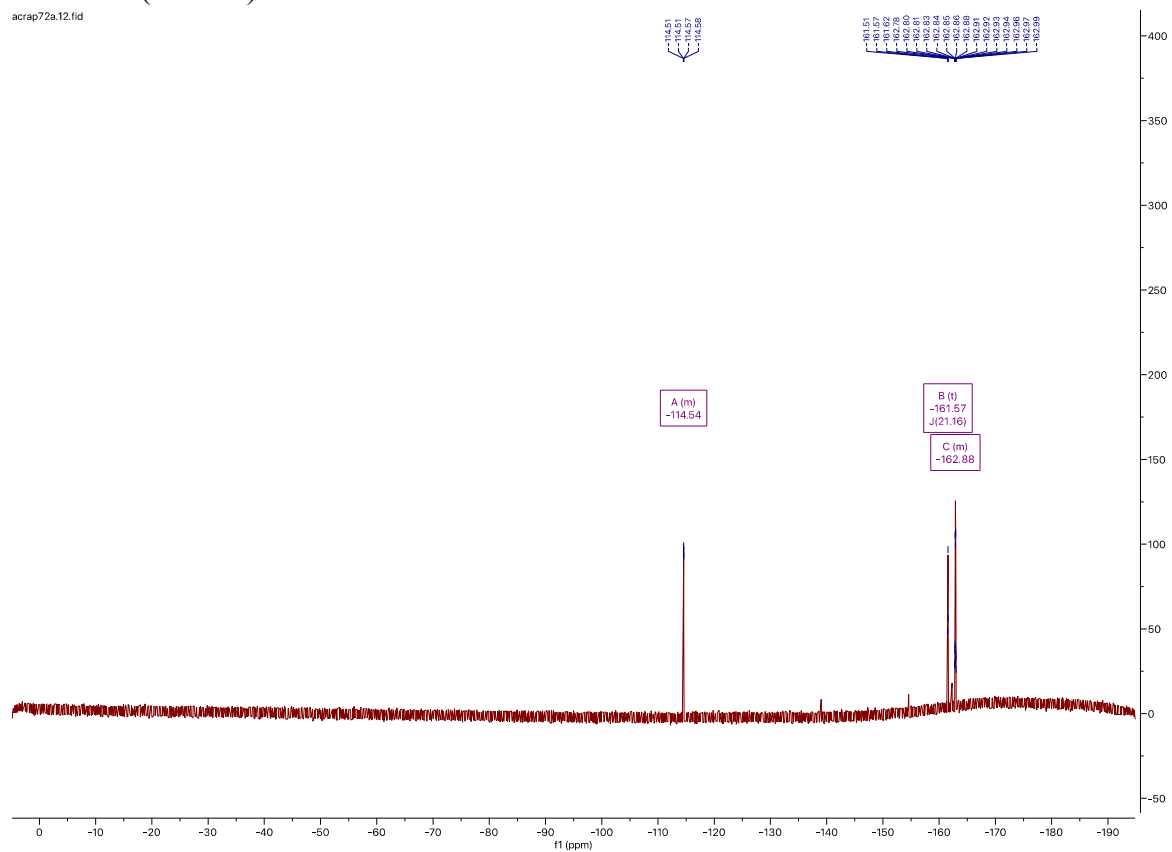

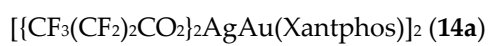

$^1\text{H}$  NMR ( $\text{CD}_2\text{Cl}_2$ )

acrap53a.10.fid

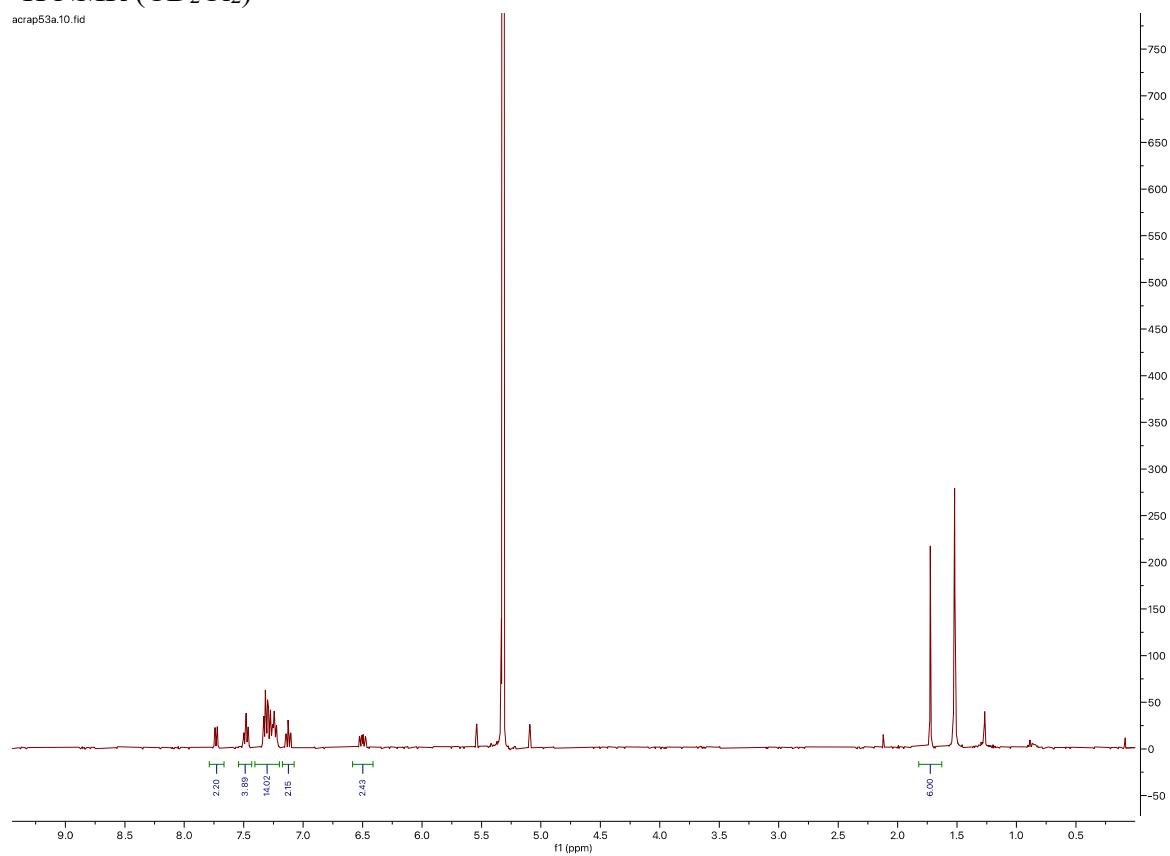

$^{31}\text{P}\{^1\text{H}\}$  NMR ( $\text{CD}_2\text{Cl}_2$ )

acrap53a.12.fid

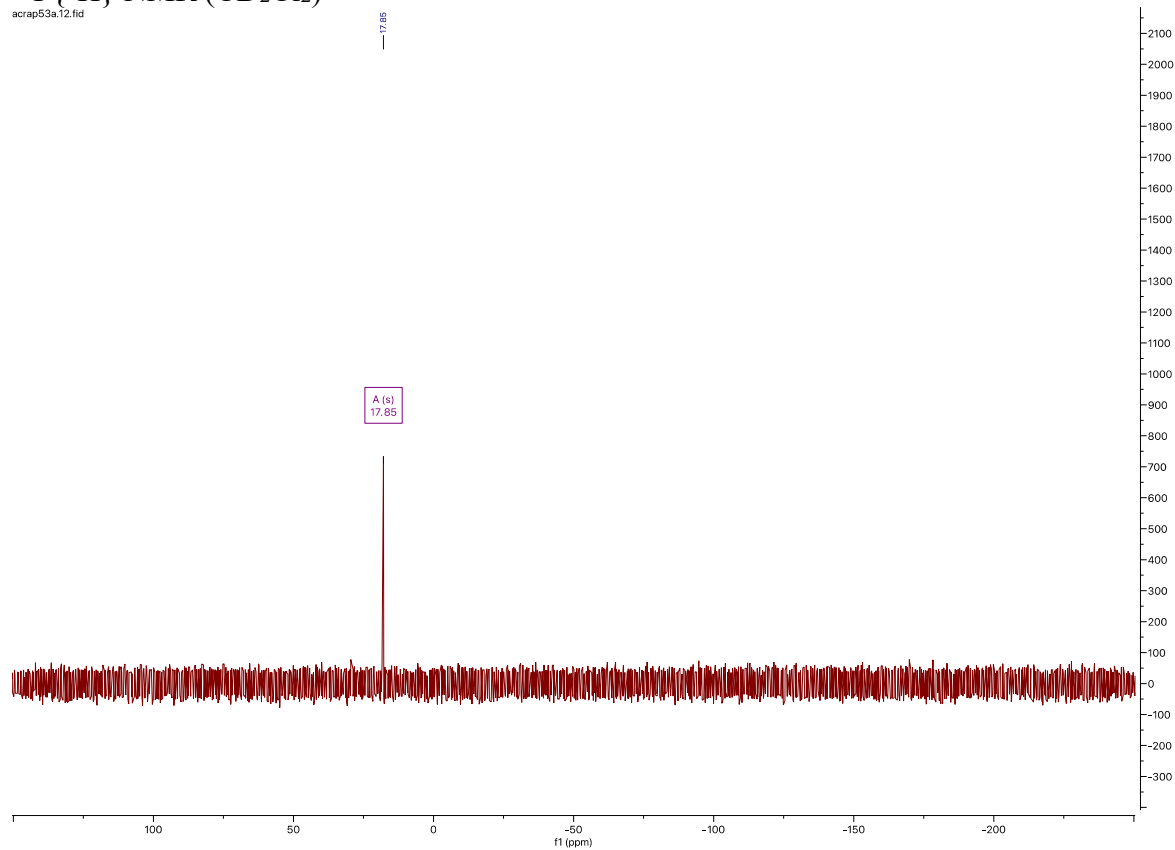

# $^{19}\text{F}$ NMR ( $\text{CD}_2\text{Cl}_2$ )

acrap53a.11.fid

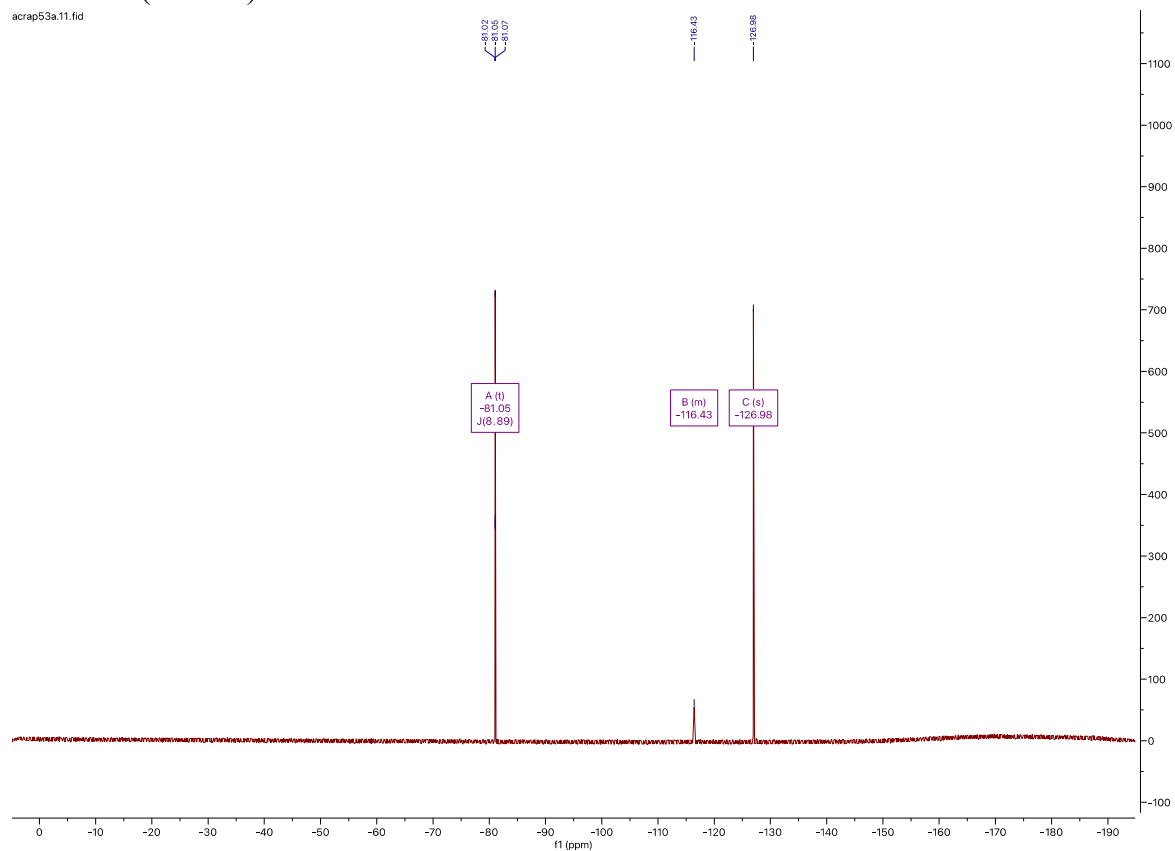

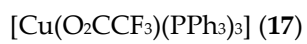

$^1\text{H}$  NMR ( $\text{CD}_2\text{Cl}_2$ )

acfm763.10.fid

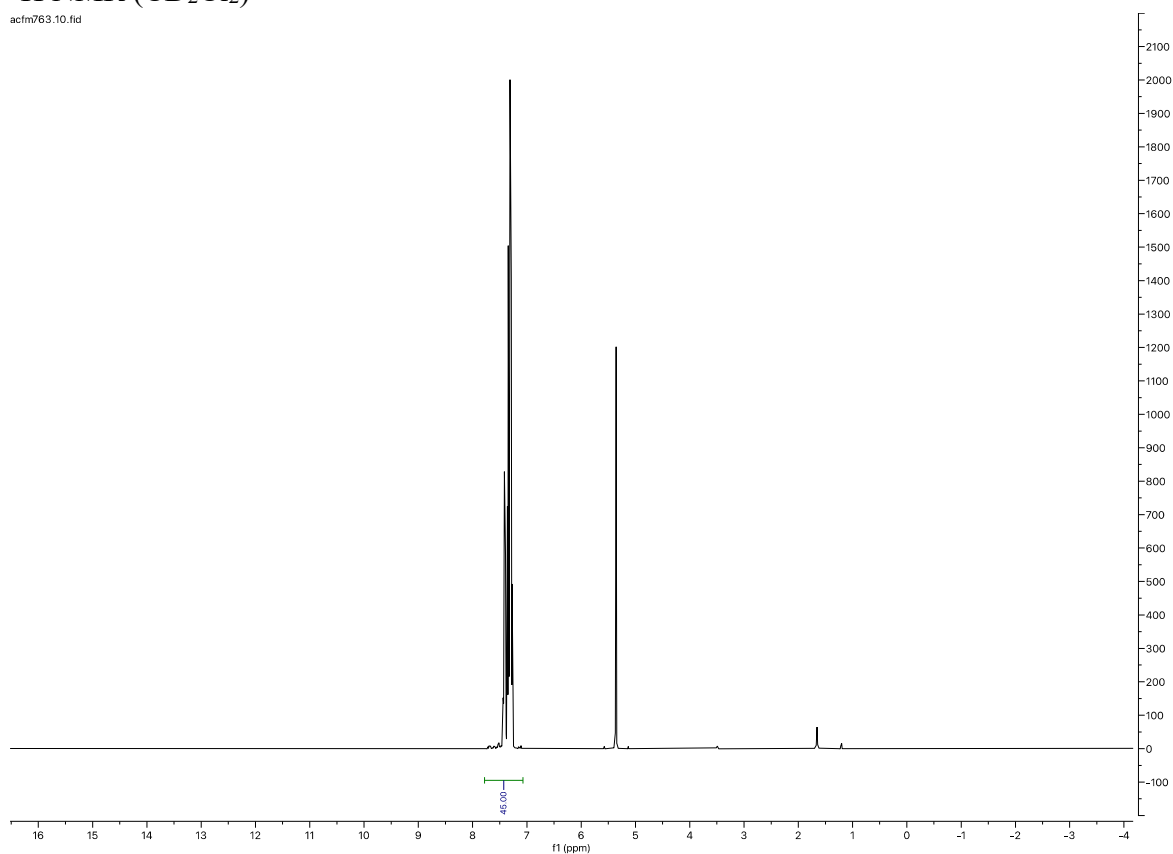

$^{31}\text{P}\{^1\text{H}\}$  NMR ( $\text{CD}_2\text{Cl}_2$ )

acfm763.12.fid

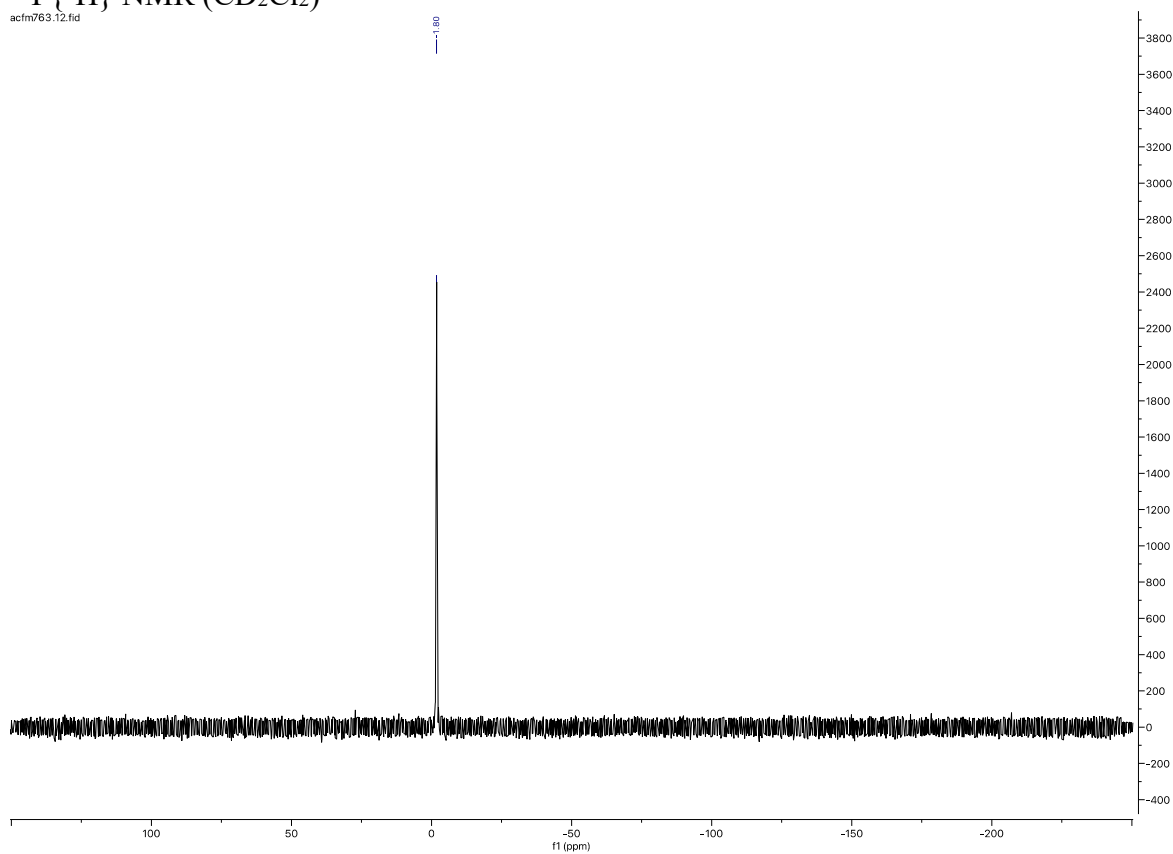

# $^{19}\text{F}$ NMR ( $\text{CD}_2\text{Cl}_2$ )

acfm763.11.fid

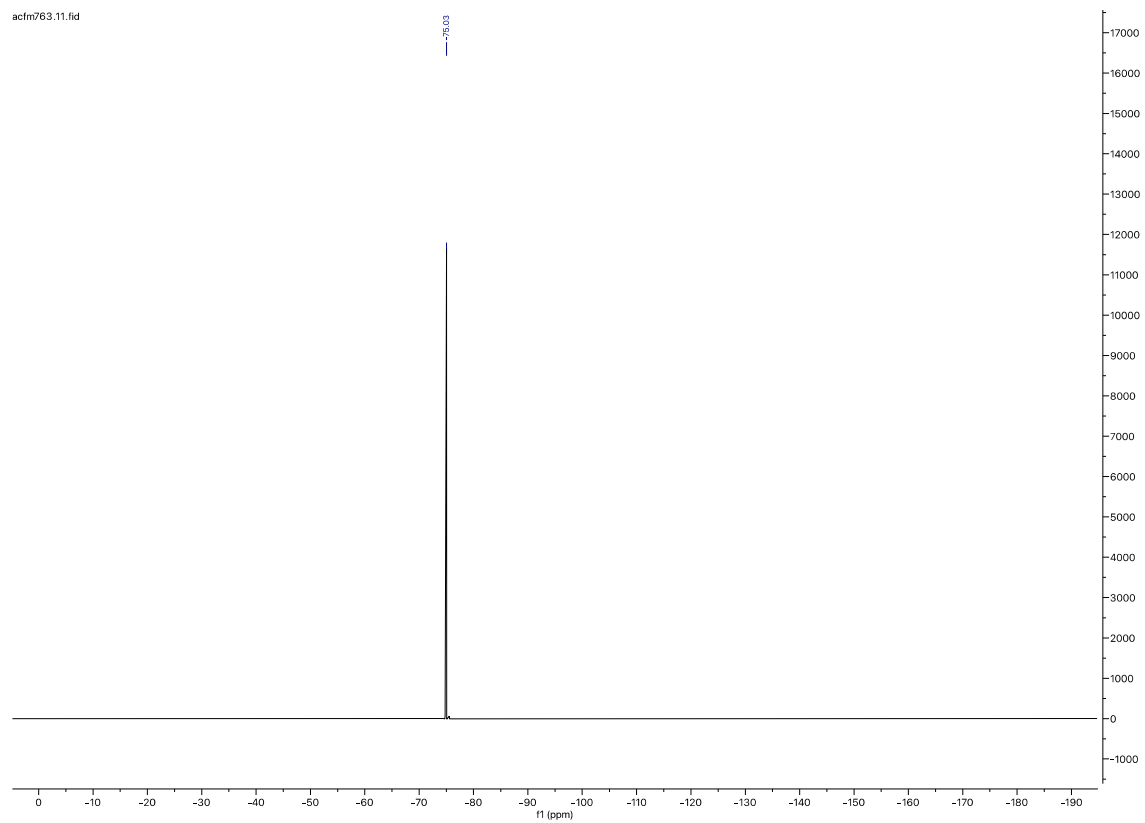

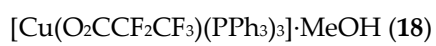

$^1\text{H}$  NMR ( $\text{CD}_2\text{Cl}_2$ )

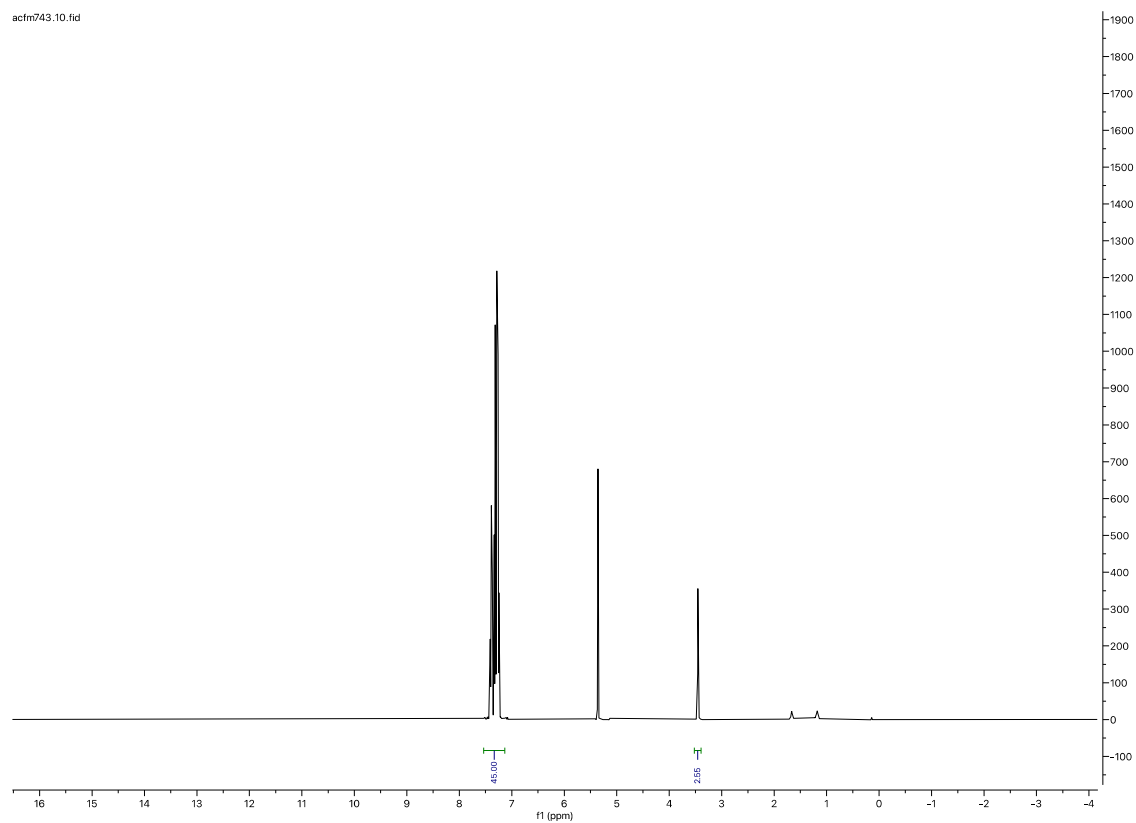

$^{31}\text{P}\{^1\text{H}\}$  NMR ( $\text{CD}_2\text{Cl}_2$ )

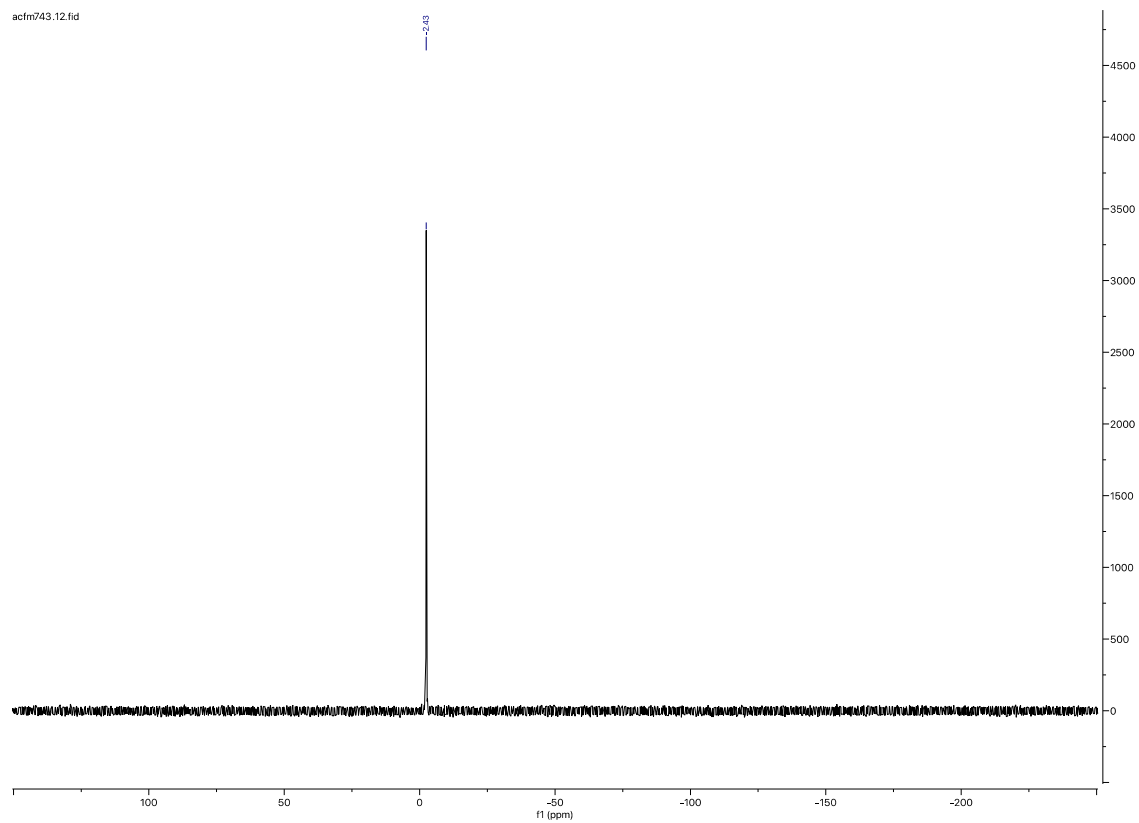

# $^{19}\text{F}$ NMR ( $\text{CD}_2\text{Cl}_2$ )

acfm743.11.fid

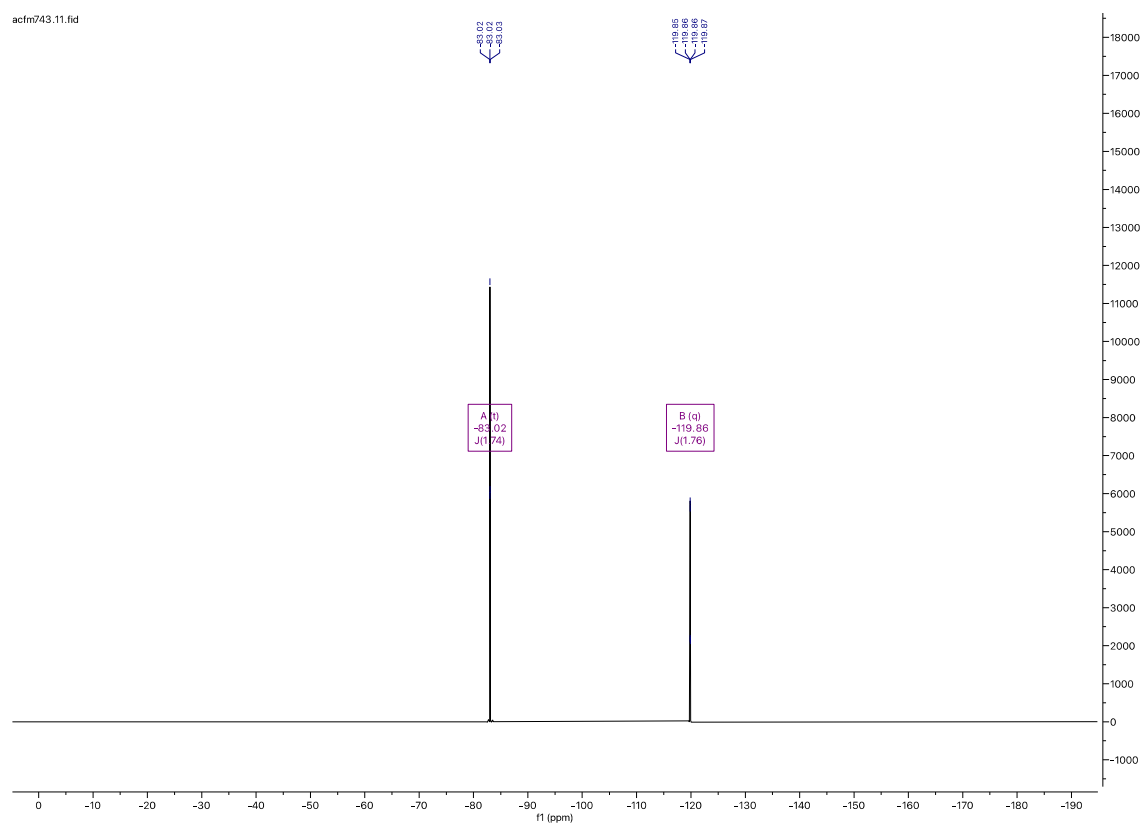



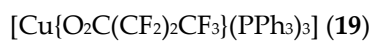

$^1\text{H}$  NMR ( $\text{CD}_2\text{Cl}_2$ )

acfm735.10.fid

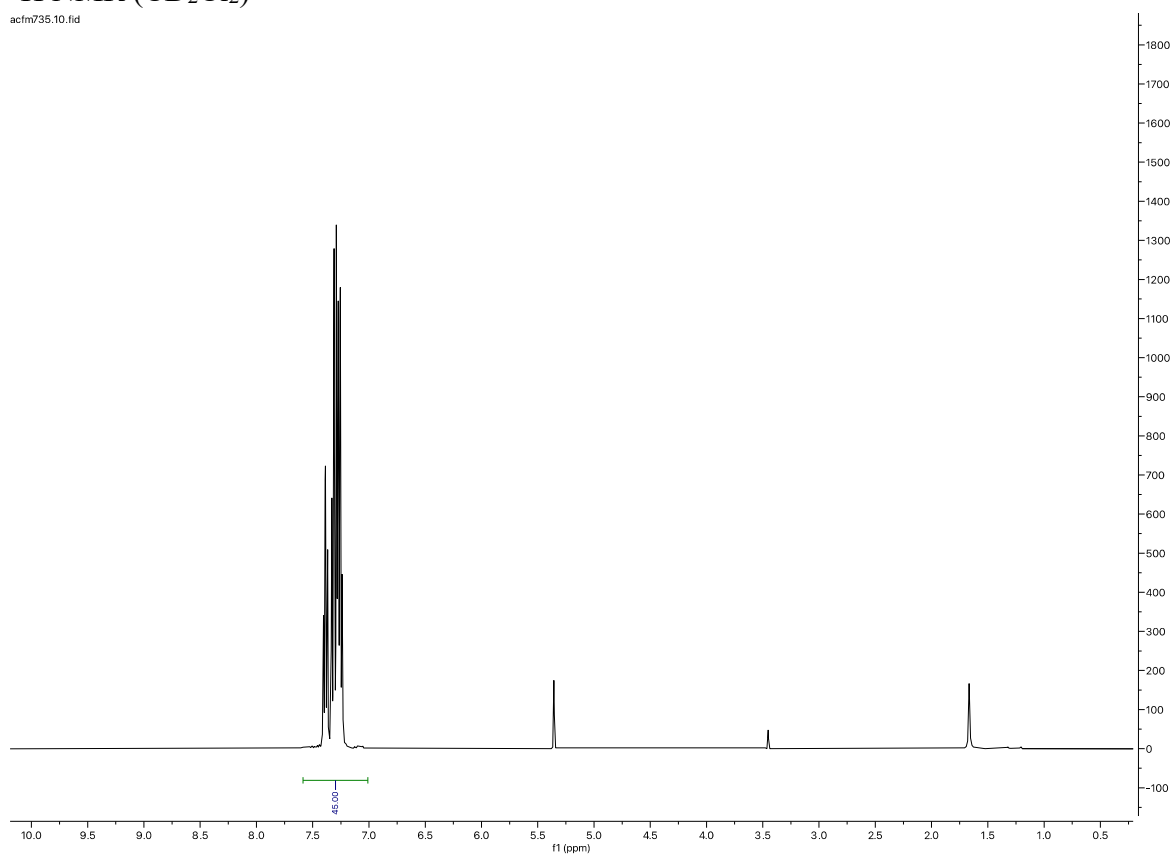

$^{31}\text{P}\{^1\text{H}\}$  NMR ( $\text{CD}_2\text{Cl}_2$ )

acfm735.12.fid

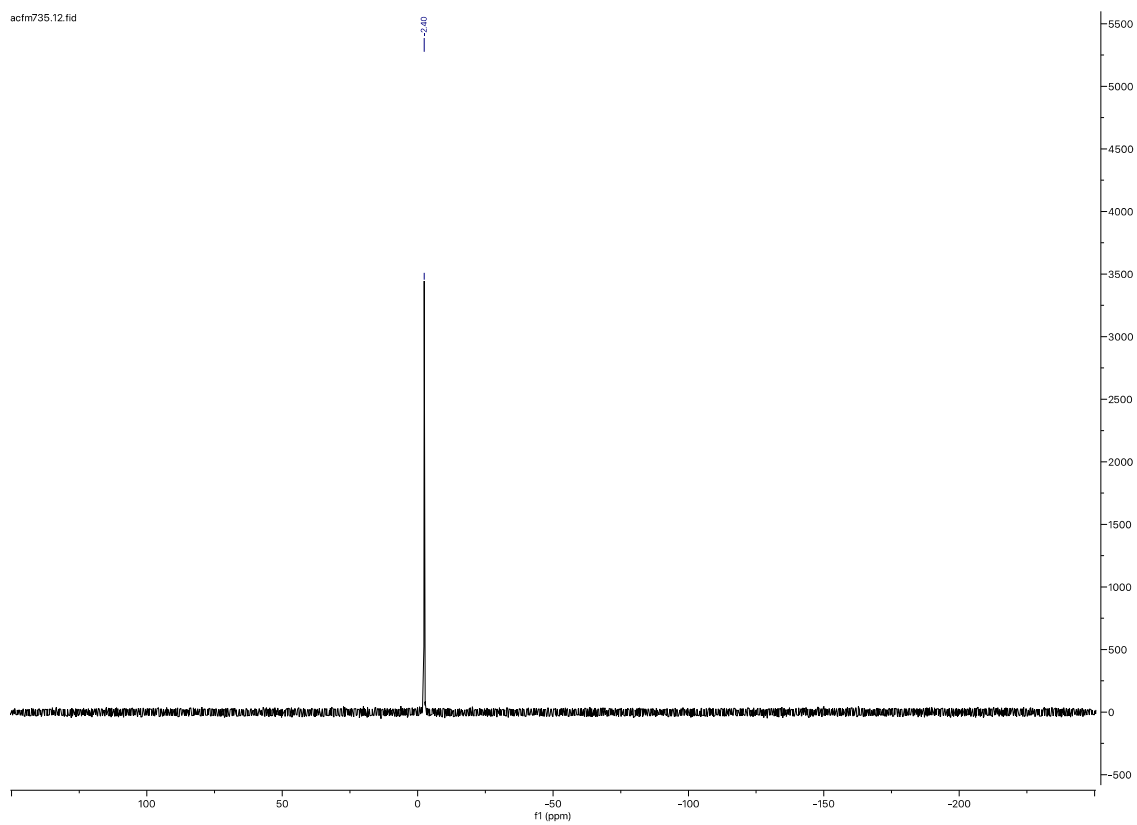

# $^{19}\text{F}$ NMR ( $\text{CD}_2\text{Cl}_2$ )

acfm735.11.fid

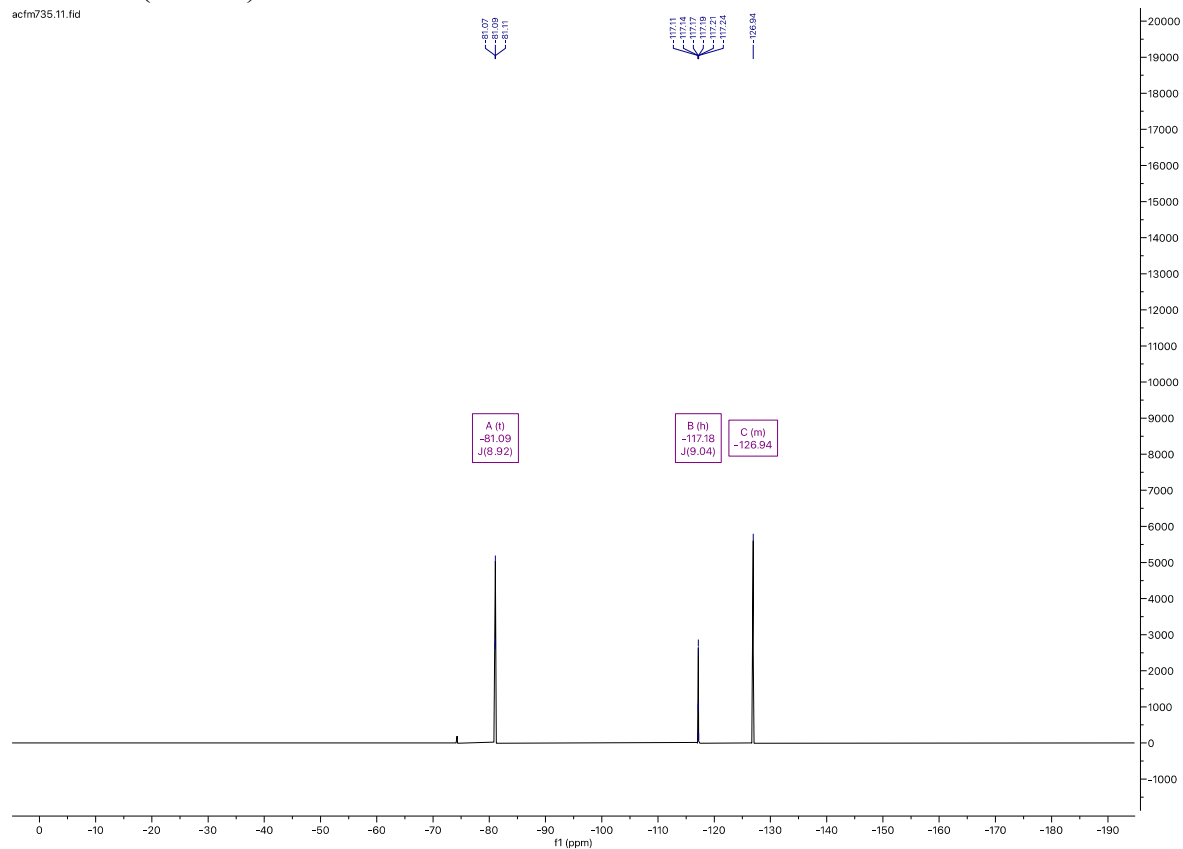

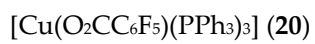

$^1\text{H}$  NMR ( $\text{CD}_2\text{Cl}_2$ )

acrap93a1.10.fid

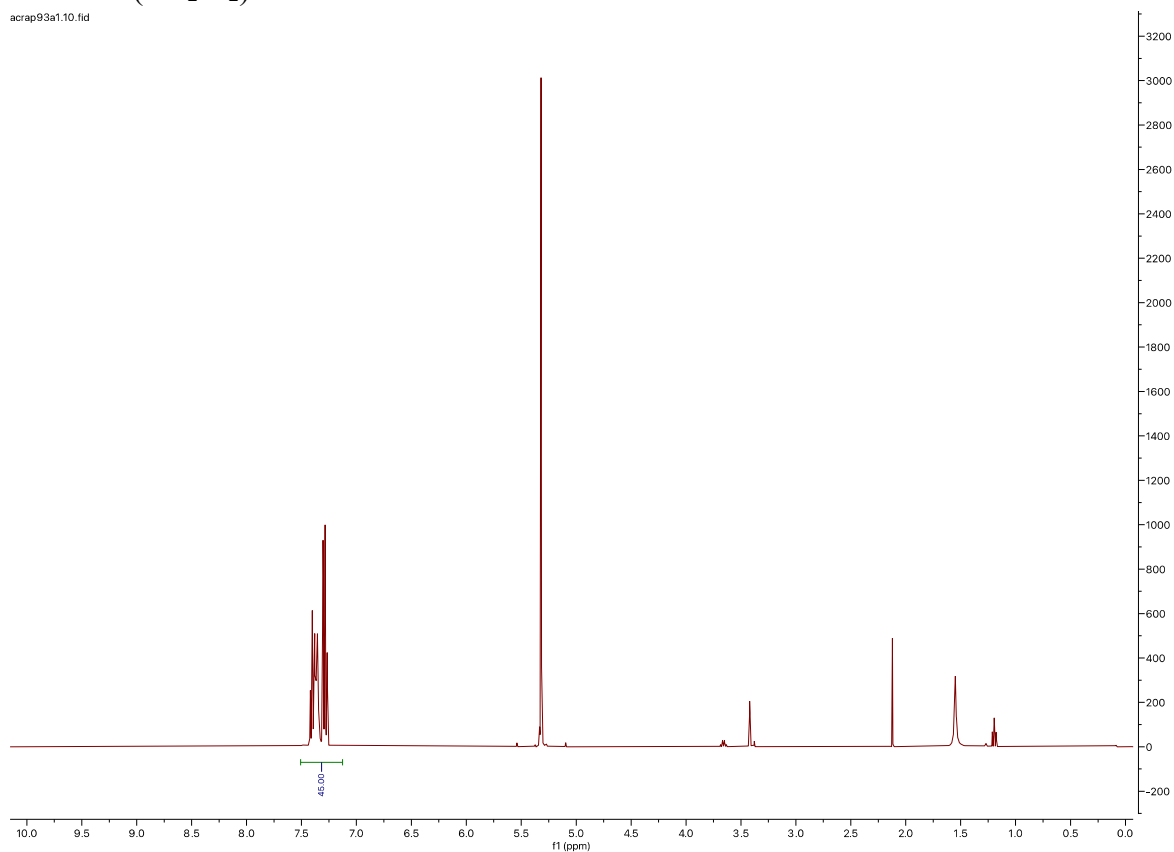

$^{31}\text{P}\{^1\text{H}\}$  NMR ( $\text{CD}_2\text{Cl}_2$ )

acrap93a1.32.fid

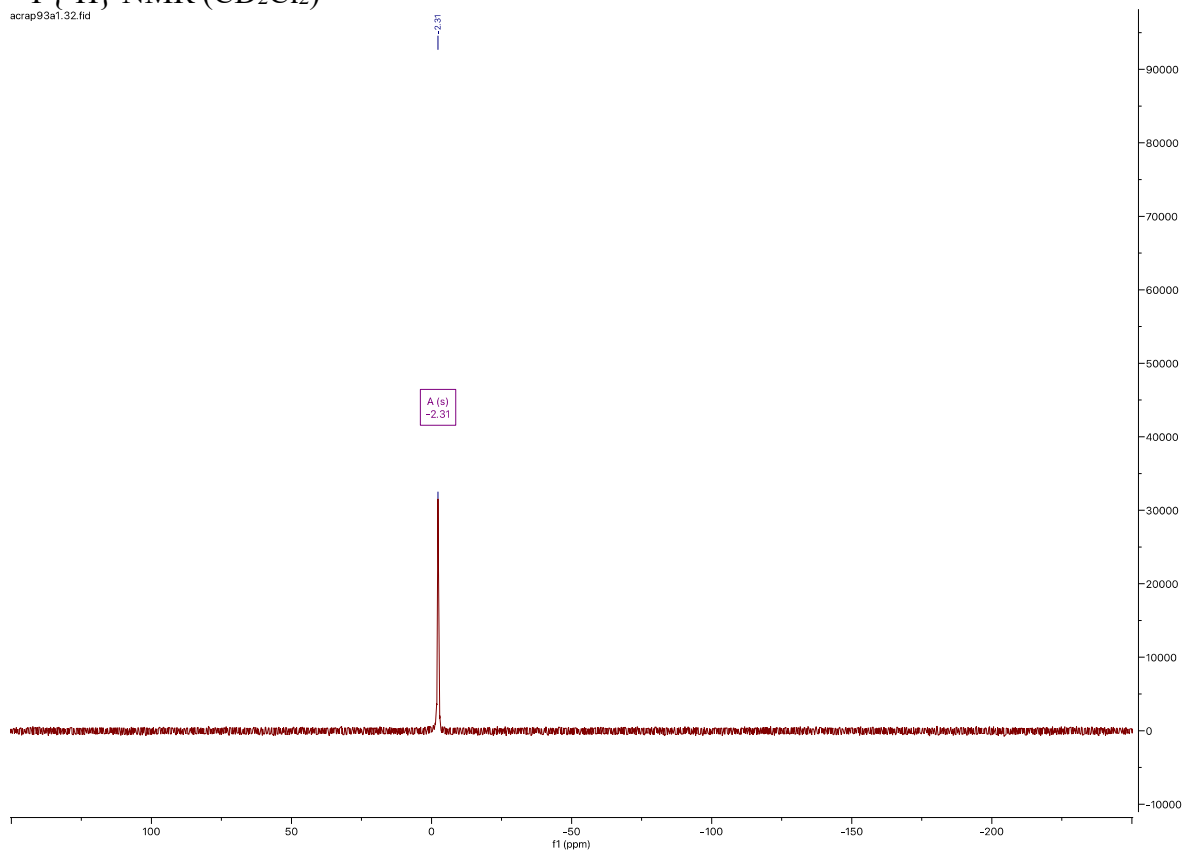

## acrap93a1.11.fid

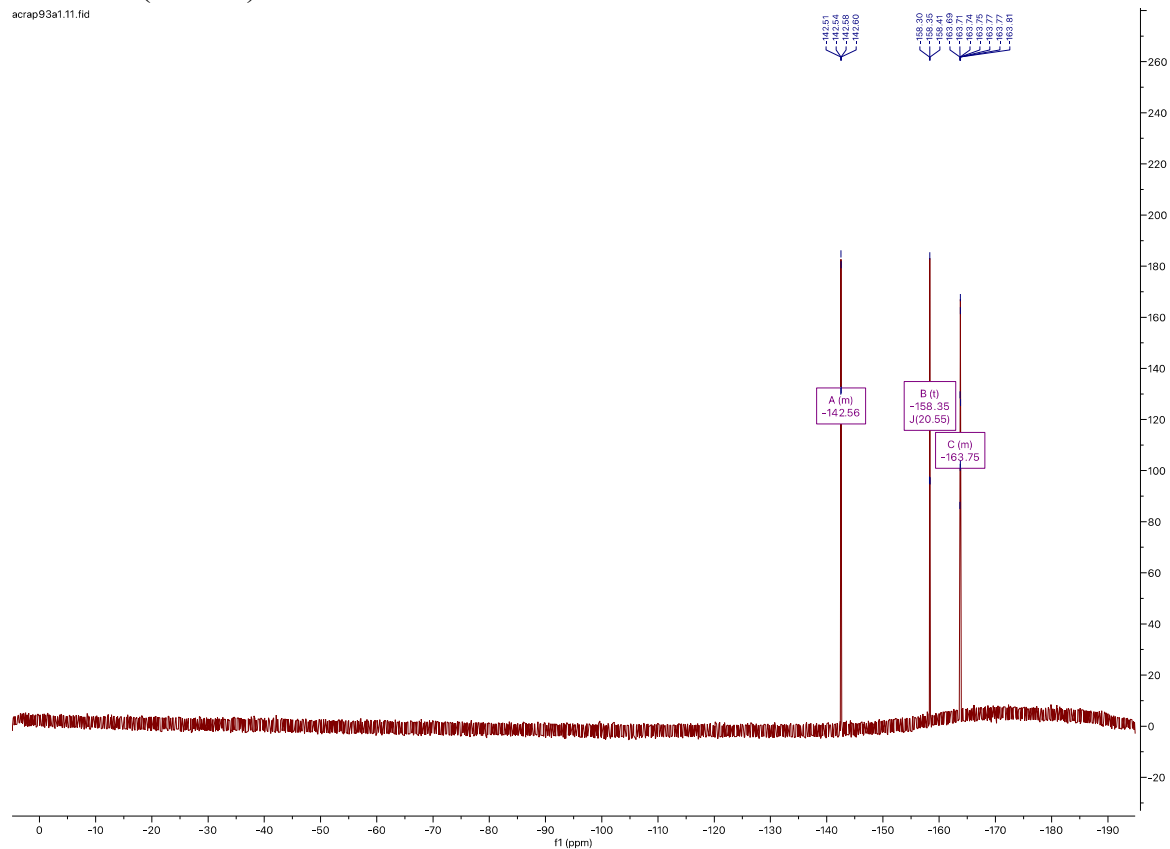

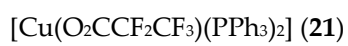

$^1\text{H}$  NMR ( $\text{CD}_2\text{Cl}_2$ )

acrap91a1.10.fid

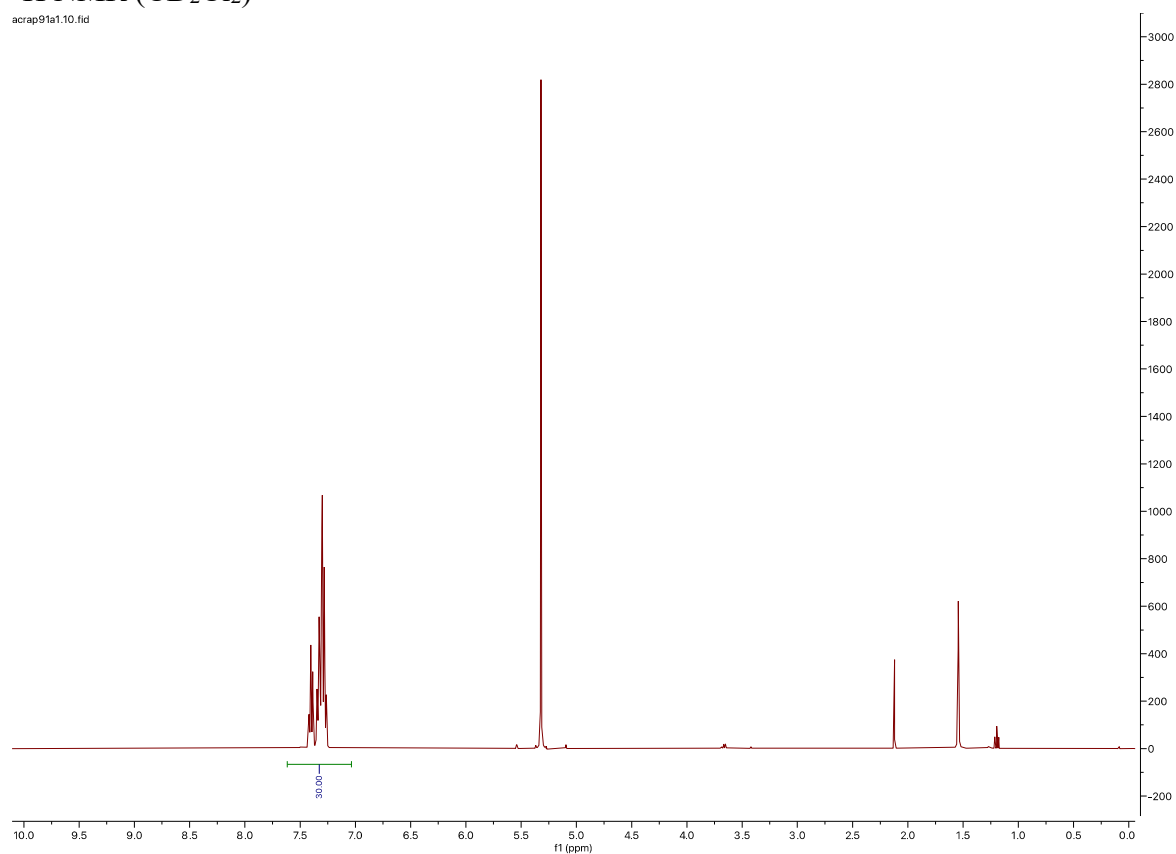

$^{31}\text{P}\{^1\text{H}\}$  NMR ( $\text{CD}_2\text{Cl}_2$ )

acrap91a1.12.fid

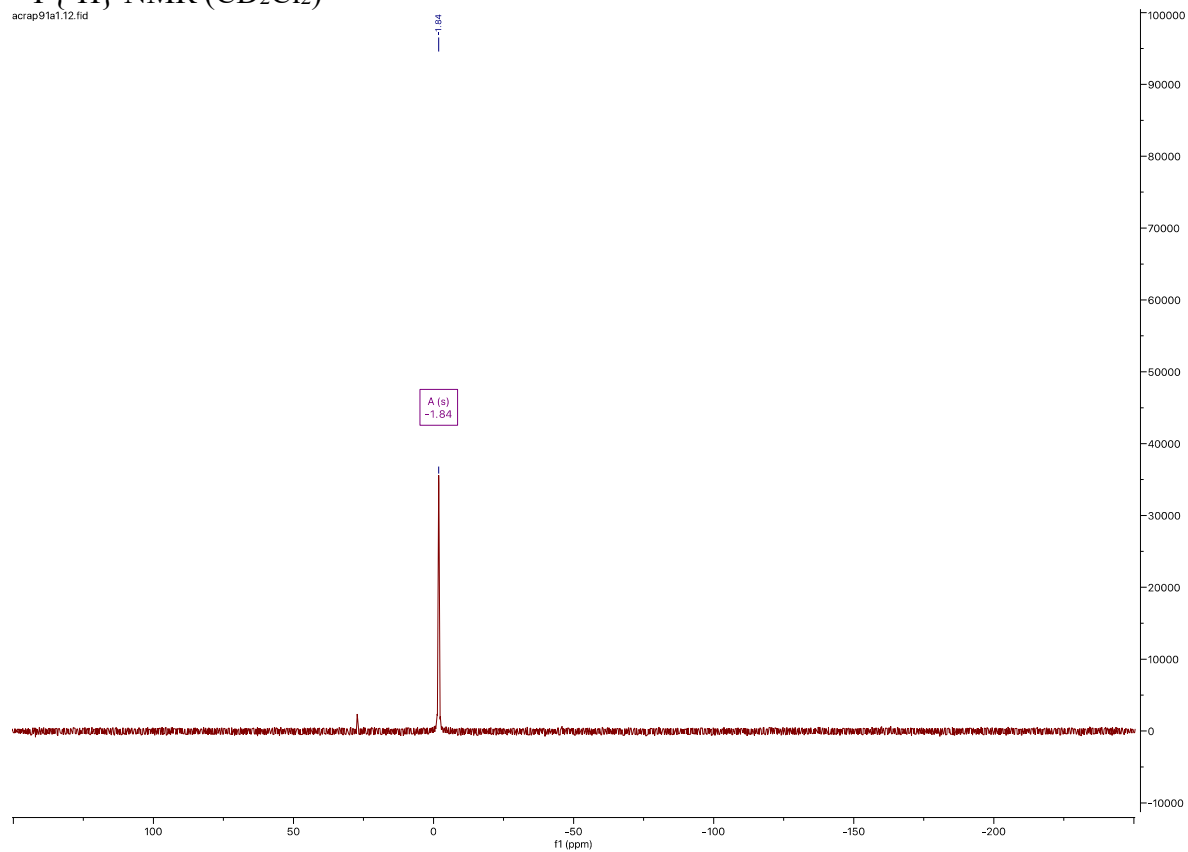

# $^{19}\text{F}$ NMR ( $\text{CD}_2\text{Cl}_2$ )

acrap91a1.11.fid

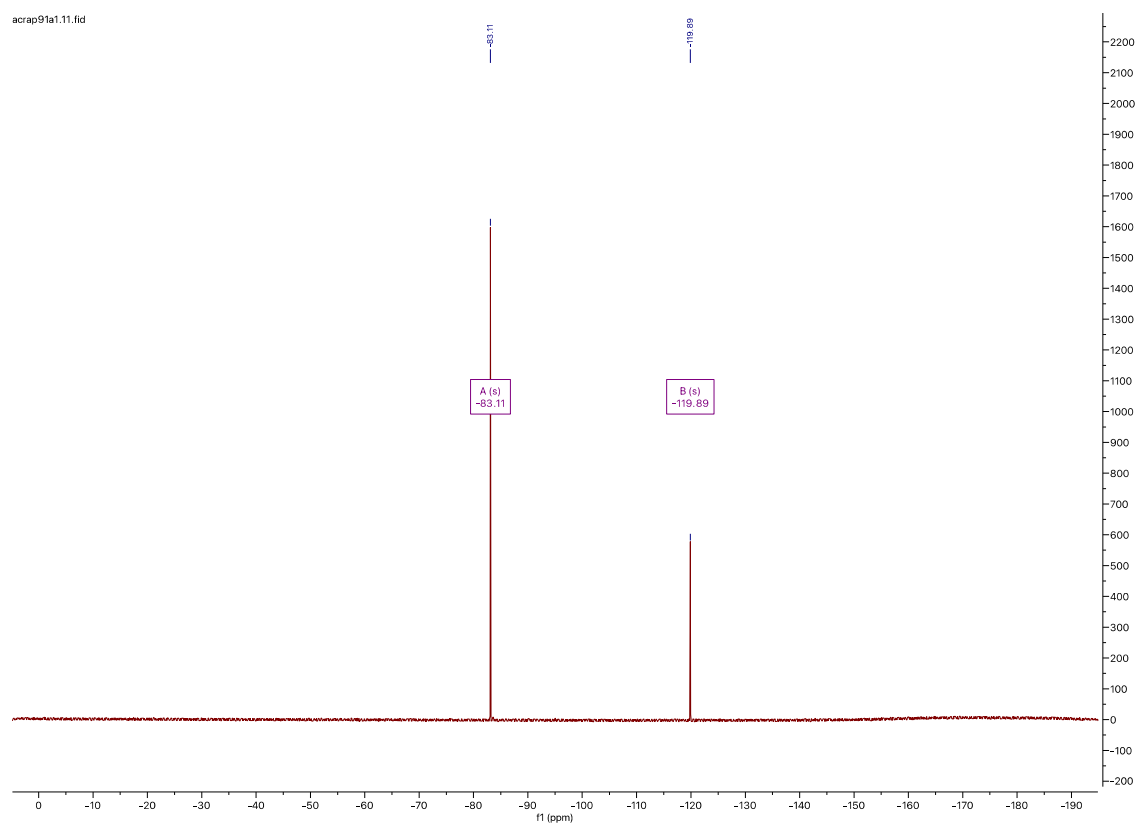

Supplement: s1 [file s1]
